# Supplementary material
Source: PubMed Central journal article supplement (PMC5769814)
Supplement: NIHMS75583-supplement-Supplementary.pdf [file NIHMS75583-supplement-Supplementary.pdf]

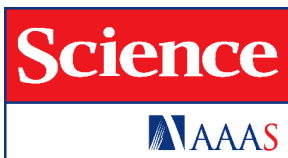

## Supplementary Materials for

### **Recent introduction of a chytrid fungus endangers Western Palearctic salamanders**

A. Martel,\* M. Blooi, C. Adriaensen, P. Van Rooij, W. Beukema, M. C. Fisher, R. A. Farrer, B. R. Schmidt, U. Tobler, K. Goka, K. R. Lips, C. Muletz, K. Zamudio, J. Bosch, S. Lötters, E. Wombwell, T. W. J. Garner, A. A. Cunningham, A. Spitzen-van der Sluijs, S. Salvidio, R. Ducatelle, K. Nishikawa, T. T. Nguyen, J. E. Kolby, I. Van Bocxlaer, F. Bossuyt, F. Pasmans

\*Corresponding author. E-mail: [an.martel@ugent.be](mailto:an.martel@ugent.be)

Published 31 October 2014, *Science* **346**, 630 (2014)

DOI: [10.1126/science.1258268](https://doi.org/10.1126/science.1258268)

#### **This PDF file includes:**

Materials and Methods  
Figs. S1 to S5  
Tables S1 to S10  
References

## Materials and Methods

### Animal infections

The infection experiments, approved by the ethical committee of the Faculty of Veterinary Medicine (Ghent University), were performed as described before (3). In total, 48 anurans, belonging to 10 species, 112 urodelans, belonging to 24 species and a single caecilian were used (Table S1). All animals were healthy and negative for *B. salamandrivorans*, *B. dendrobatidis* and Ranavirus. After infection, monitoring for clinical signs was performed daily and the microbiological status was assessed by weekly swabbing and qPCR analysis (6). Positive animals were kept until they died or returned negative. Negative animals were euthanized after three negative qPCR results obtained with one week intervals. Chytridiomycosis was diagnosed using histological examination on haematoxylin eosin staining of transverse sections through the body: behind the forelegs, before the hind legs and in the middle of the tail (only for urodela). Since most specimens were obtained from single source populations, in order to avoid lineage specific biases, conclusions were drawn on higher taxonomic levels rather than at the species level.

To determine *B. salamandrivorans*' invasive ability amphibians belonging to 7 anuran and 10 urodelan species (one animal per species) (Table S1) were exposed to a high amount (10,000) of zoospores for 24 hours and euthanized immediately after exposure. A piece of abdominal skin was taken and stained immunohistochemically to detect skin invasion (9). The experiment was performed in duplicate.

To determine interspecies *B. salamandrivorans* transmission between susceptible European urodelan species, six infected *Salamandra salamandra* (mean log(10) GE load per swab: 1.74 +/-0.12) were co-housed (1:1) with four uninfected *Ichthyosaura alpestris* or two uninfected *Pleurodeles waltl*. To determine transmission from a presumed reservoir species to a susceptible European species, three infected *Cynops pyrrhogaster* (mean log(10) GE load per swab: 1.68 +/-0.14) were co-housed (1:1) with three uninfected *Salamandra salamandra*. Co-housing lasted 8 hours at 5°C (two *Ichthyosaura alpestris*) and 15°C (two *Ichthyosaura alpestris*, two *Pleurodeles waltl* and three *Salamandra salamandra*). After co-housing, monitoring for clinical signs was performed daily during 10 days and the microbiological status was assessed by weekly swabbing and qPCR analysis (6).

### Screening

Toe clips from museum specimens (Supplementary Table S4) were taken from specimens deposited at in the Museum for Natural History - Naturalis, Leiden, The Netherlands. DNA was extracted using the QIAamp FFPE Tissue kit (Qiagen). Previously collected samples from amphibian assemblages, trade (pet shops in Europe, exporter in Hong Kong and Heathrow Airport) and captive kept amphibians (10-26) (Supplementary Table S2, S5, S7) were tested for the presence of *B. salamandrivorans* using qPCR (6).

### Bayesian divergence time estimates for the origin of *B. salamandrivorans*

We combined protein sequences from three nuclear genes, RPB1, RPB2 and EF1a for a representative set of 12 ingroup fungal species and one fungal outgroup (*Rozella allomyces*). Alignment of the protein sequences was done with MAFFT (27) using the L-

INS-i method and resulted in a data matrix of 1973 reliably aligned amino acids. Maximum Likelihood (ML) analyses were run in PAUP\* (28), using a LG amino-acid rate matrix with empirical frequencies, estimated proportion of invariable sites (0.235325) and distribution of rates at variable sites following a gamma distribution with four categories and estimated shape parameter 0.69288. This resulted in a single ML tree with likelihood score  $-\ln L = 20836.93$ . Support was calculated as Bayesian posterior probabilities in MrBayes (29). To estimate the age of the divergence of *B. dendrobatidis* from *B. salamandrivorans*, we used a Bayesian relaxed molecular clock model implemented in Beast v1.7.5 (30). As a calibration point, we used the divergence of *Hyaloraphidium curvatum* from its sister clade, a relationship that is strongly supported by the literature (31) and in our ML tree. We implemented a broad range for this calibration based on Berney et al. (32), who estimated this divergence at 651.2 million years ago, with an upper bound of 860.0 and a lower bound of 477.4 for the 95% confidence interval. We used this information to set the prior distribution for our calibration point to a normal distribution with the same mean of 651.2 mya, and a standard deviation of 106.6, corresponding to a 95% highest posterior density (HPD) ranging from 860.1 till 442.3 mya. These settings for our calibration thus completely encompass the broad range of Berney et al. (32). The MCMC chain was run for 10 million generations and trees were sampled every 1,000 generations. Convergence of parameters and a burn-in of 2,000 were determined with Tracer v1.3. The median and 95% HPD for fungal time estimates (Fig. S3) were therefore calculated from 8,000 sampled trees.

#### Amphibian timetree construction

The amphibian timescale was constructed using all but one species (i.e., 34 operational taxonomic units) that had been experimentally tested for their susceptibility against *B. salamandrivorans*. One *Ambystoma* species was excluded from the analyses because a divergence estimate between *Ambystoma opacum* and *Ambystoma maculatum* was not available. This however does not influence any of the results obtained.

Dating estimates for amphibian diversification were based on previous work (7, 31, 33-37).

#### Ancestral reconstruction of amphibian susceptibility

We used the results of our infection experiments as a proxy to reconstruct the evolution of susceptibility against *B. salamandrivorans* in the three amphibian orders.

The results of the experimentally infected amphibians were classified into four categories:

1. Resistant (no infection, no disease), 2. Tolerant (infection in the absence of disease), 3. Susceptible (infection resulting in clinical disease with subsequent recovery) or 4. Lethal. The classification per species is listed in Table S9.

Ancestral state reconstructions were performed using Maximum Parsimony (MP) and Maximum Likelihood (ML) approaches on the timetree (see amphibian timetree construction) with Mesquite v2.6 (38). MP reconstructions were done with characters unordered and equally weighted. ML reconstructions were done under a single rate Mk likelihood model (mk1) for discrete characters (38), and the likelihood decision threshold was set to 2.0 (default). The results are listed in Table S10. Corresponding node numbers can be found in Fig. S5. Both analyses gave similar results.

## Supplementary figures

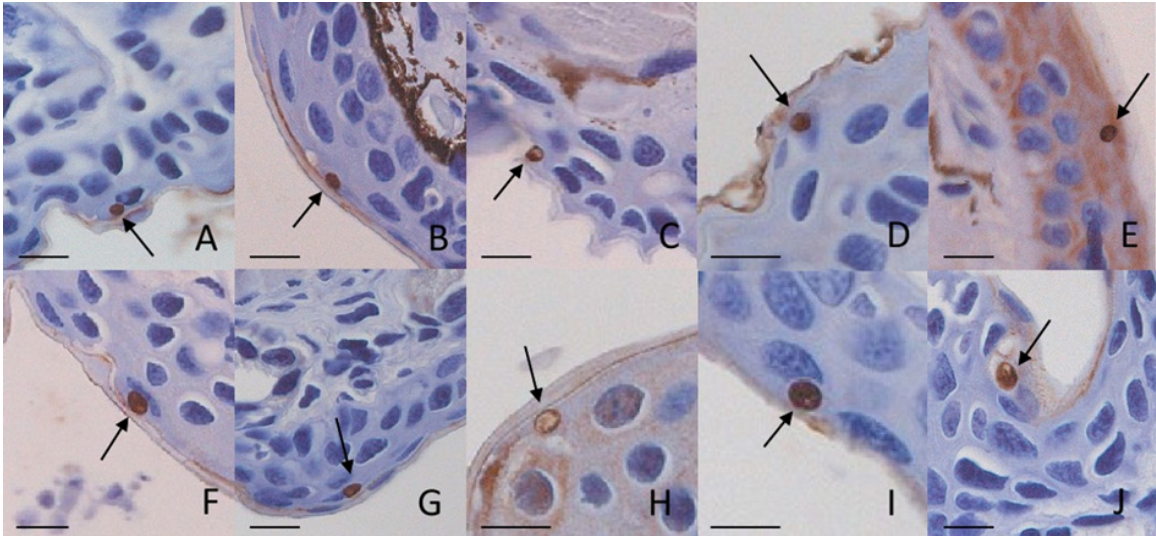

**Fig. S1. Invasion of *B. salamandrivorans* in the urodelan abdominal skin after 24 hours exposure.** Immunohistochemical staining. Arrows point at *B. salamandrivorans* organisms. A. *Ichthyosaura alpestris*, B. *Triturus cristatus*, C. *Lissotriton helveticus*, D. *Notophthalmus viridescens*, E. *Pleurodeles waltl*, F. *Neurergus crocatus*, G. *Euproctus platycephalus*, H. *Salamandrella keyserlingii*, I. *Plethodon glutinosus*, J. *Salamandra salamandra*. Scale bar = 10  $\mu$ m.

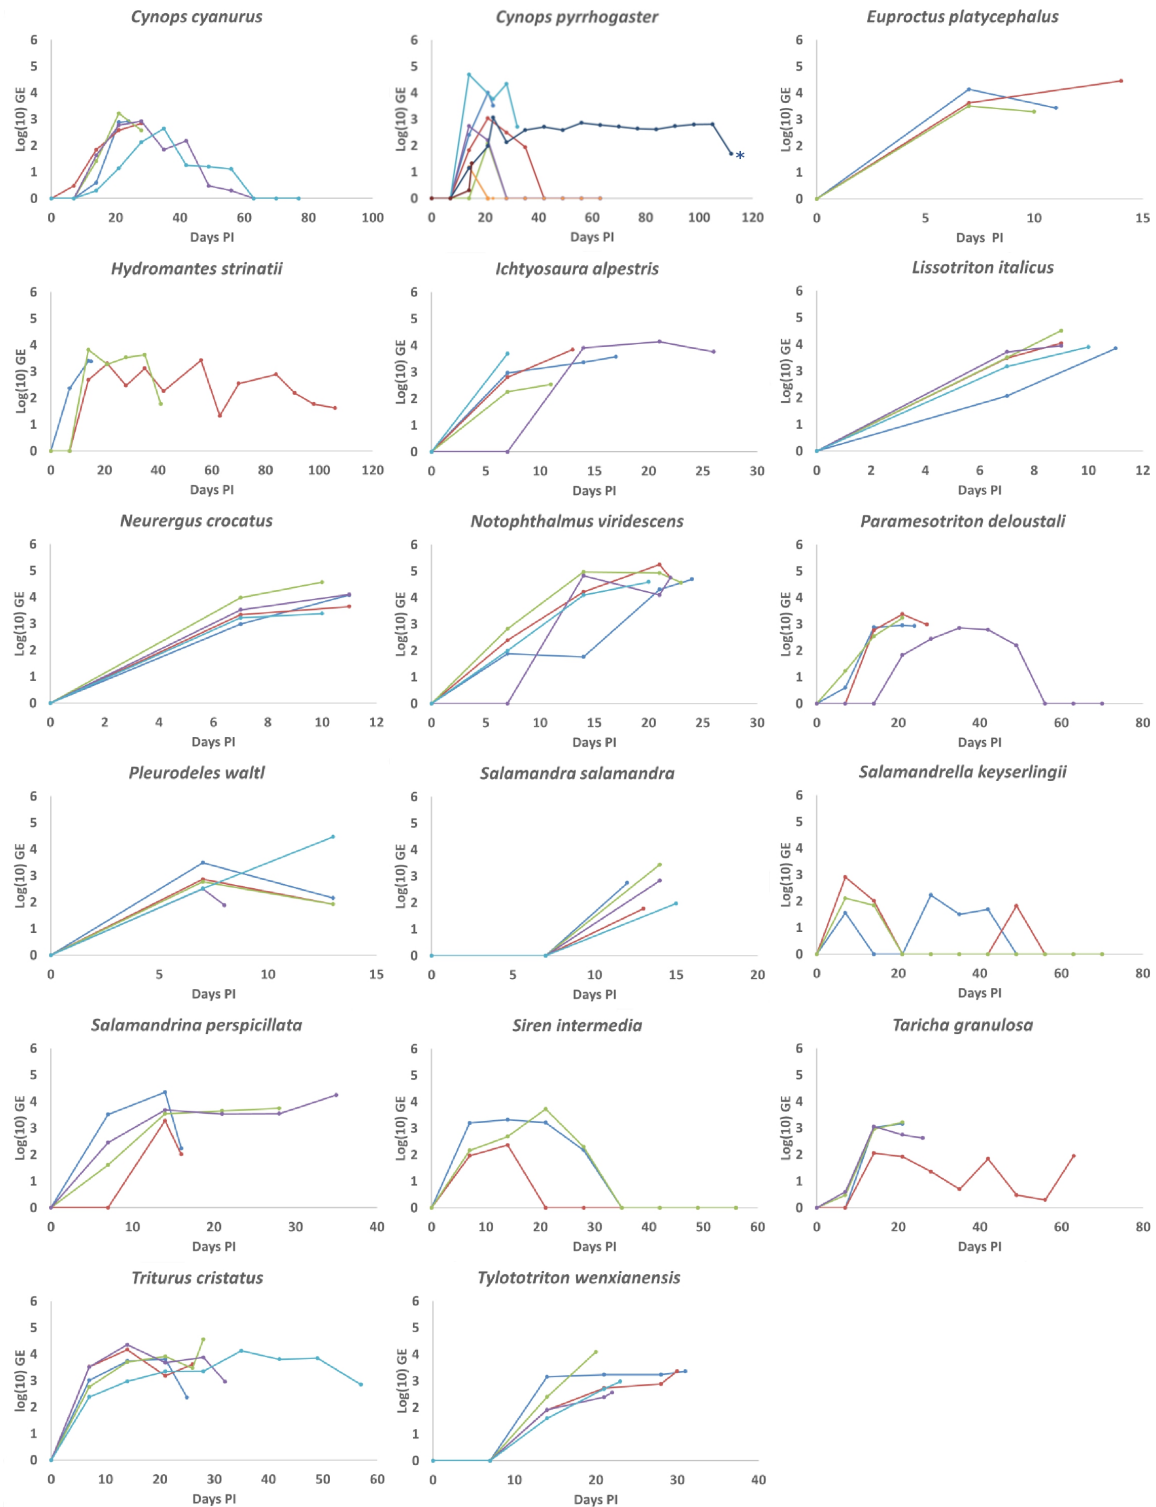

**Fig. S2. *B. salamandrivorans* infection course in infected amphibian species.** Log(10) genomic equivalent (GE) values expressed per swab.

\* End of experiment with animal showing no clinical anomalies

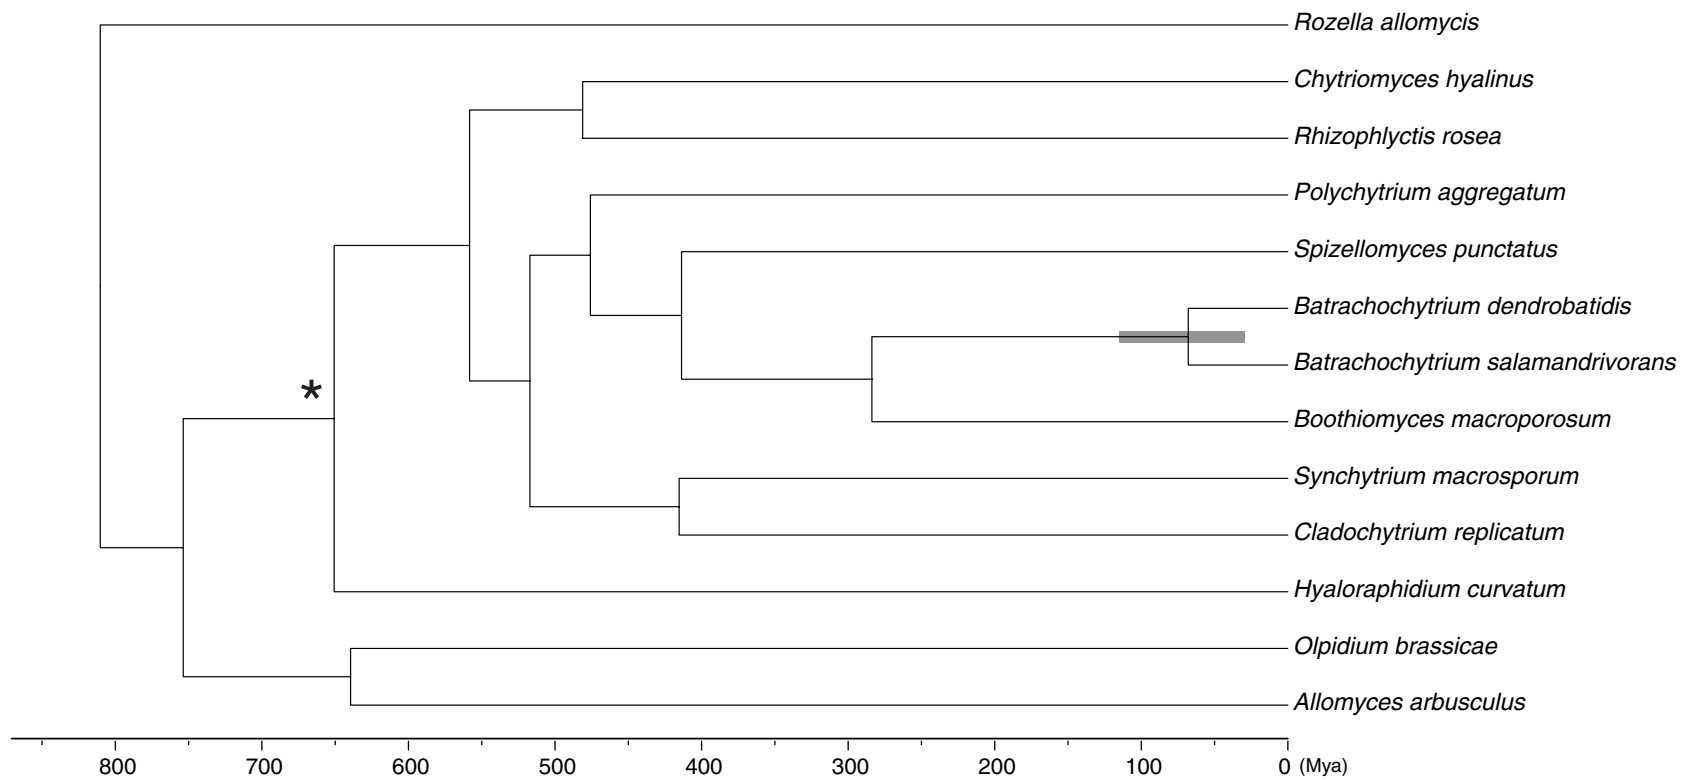

**Fig. S3. Divergence time estimates for fungi.** The asterisk denotes the calibration point, the grey bar indicates the 95% HPD for the divergence of *B. salamandrivorans* from its sister species.

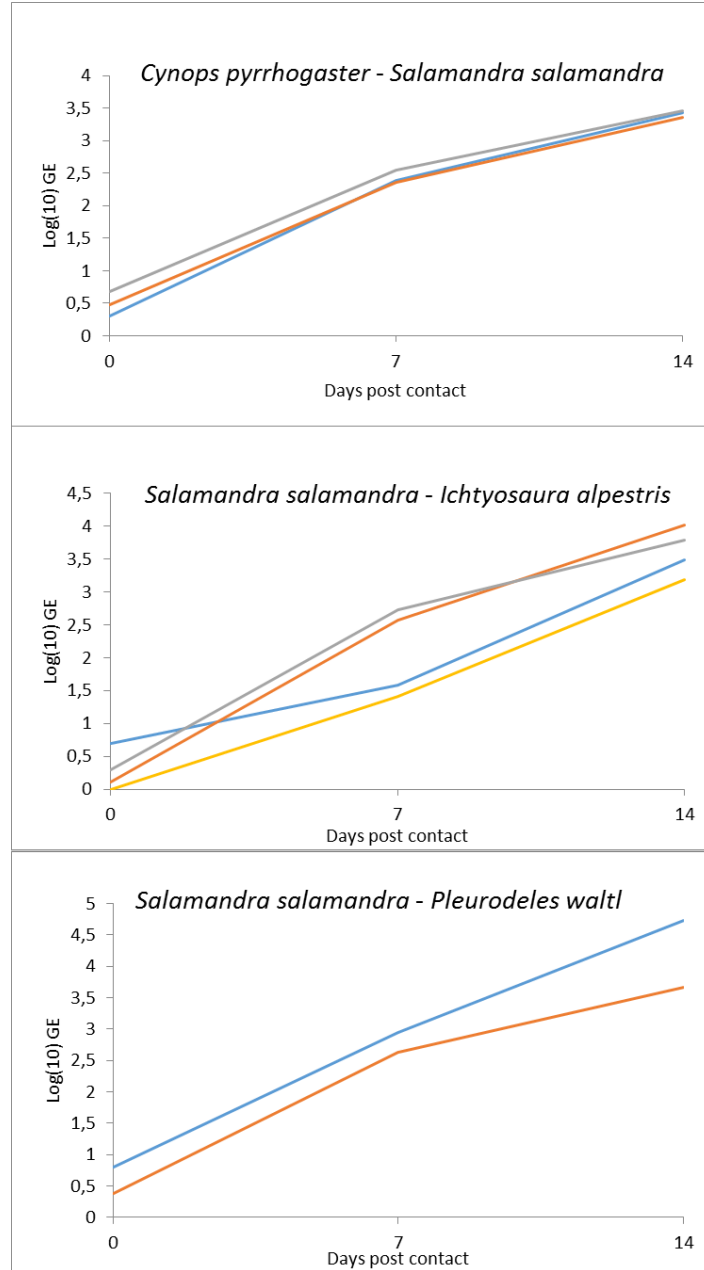

**Fig. S4. Interspecies transmission of *B. salamandrivorans*.** *B. salamandrivorans* infected *Cynops pyrrhogaster* and *Salamandra salamandra* were co-housed with *B. salamandrivorans* negative *Salamandra salamandra* and *Ichthyosaura alpestris* or *Pleurodeles waltl*, respectively, for 8 hours. Immediately after the co-housing and one and two weeks later, the animals were swabbed (time point 0). Log (10) GE values expressed per swab.

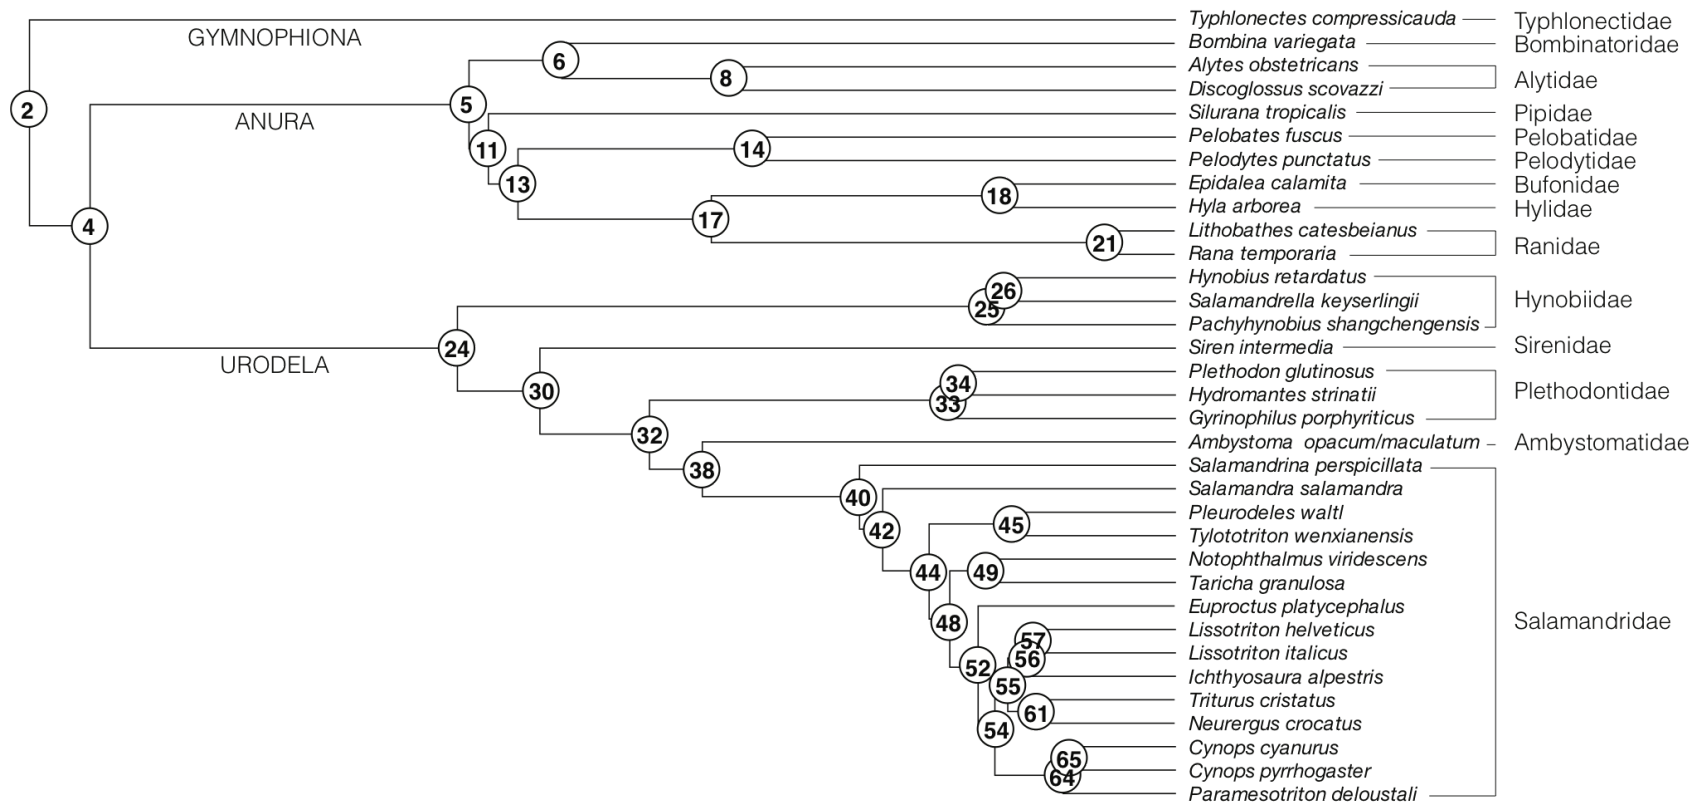

**Fig. S5. Tree of 34 amphibian species with node numbers that are cross-referenced in the ancestral state reconstructions of Table S10.**



## Supplementary tables

**Table S1. Summary of the infection experiments.** Responses to infection (in terms of presence or absence of *B. salamandrivorans* colonization after exposure) were always highly consistent within a given taxon, even if multiple sources of animals were used.

| Amphibian species              | Family         | Age      | Origin          | Continent of origin | No used <sup>a</sup> | No Infected <sup>b</sup> | No Sick <sup>c</sup> | No Dead <sup>d</sup> | Average days to mortality (min – max) | Invasion <sup>e</sup> | Category <sup>h</sup> |
|--------------------------------|----------------|----------|-----------------|---------------------|----------------------|--------------------------|----------------------|----------------------|---------------------------------------|-----------------------|-----------------------|
| <b>Anura</b>                   |                |          |                 |                     |                      |                          |                      |                      |                                       |                       |                       |
| <i>Alytes obstetricans</i>     | Alytidae       | < 1 year | C1 <sup>f</sup> | Europe              | 5                    | 0                        | 0                    | 0                    | -                                     | -                     | R                     |
| <i>Bombina variegata</i>       | Bombinatoridae | > 1 year | C1              | Europe              | 4                    | 0                        | 0                    | 0                    | -                                     | -                     | R                     |
| <i>Discoglossus scovazzi</i>   | Alytidae       | < 1 year | C1              | Africa              | 5                    | 0                        | 0                    | 0                    | -                                     | -                     | R                     |
| <i>Epidalea calamita</i>       | Bufonidae      | < 1 year | C1              | Europe              | 4                    | 0                        | 0                    | 0                    | -                                     | -                     | R                     |
| <i>Hyla arborea</i>            | Hylidae        | < 1 year | C1              | Europe              | 5                    | 0                        | 0                    | 0                    | -                                     | -                     | R                     |
| <i>Lithobates catesbeianus</i> | Ranidae        | > 1 year | C1              | North America       | 5                    | 0                        | 0                    | 0                    | -                                     | -                     | R                     |
| <i>Pelobates fuscus</i>        | Pleobatidae    | < 1 year | C1              | Europe              | 5                    | 0                        | 0                    | 0                    | -                                     | Nt <sup>g</sup>       | R                     |
| <i>Pelodytes punctatus</i>     | Pelodytidae    | < 1 year | C1              | Europe              | 5                    | 0                        | 0                    | 0                    | -                                     | Nt                    | R                     |
| <i>Rana temporaria</i>         | Ranidae        | < 1 year | C1              | Europe              | 5                    | 0                        | 0                    | 0                    | -                                     | Nt                    | R                     |
| <i>Silurana tropicalis</i>     | Pipidae        | > 1 year | C1              | Africa              | 5                    | 0                        | 0                    | 0                    | -                                     | -                     | R                     |

| Amphibian species                 | Family         | Age      | Origin | Continent of origin | No used <sup>a</sup> | No Infected <sup>b</sup> | No Sick <sup>c</sup> | No Dead <sup>d</sup> | Average days to mortality (min – max) | Invasion <sup>e</sup> | Category <sup>h</sup> |
|-----------------------------------|----------------|----------|--------|---------------------|----------------------|--------------------------|----------------------|----------------------|---------------------------------------|-----------------------|-----------------------|
| <b>Urodela</b>                    |                |          |        |                     |                      |                          |                      |                      |                                       |                       |                       |
| <i>Ambystoma maculatum</i>        | Ambystomatidae | < 1 year | C1     | North America       | 5                    | 0                        | 0                    | 0                    | -                                     | -                     | R                     |
| <i>Ambystoma opacum</i>           | Ambystomatidae | < 1 year | W1     | North America       | 5                    | 0                        | 0                    | 0                    | -                                     | Nt                    | R                     |
| <i>Cynops cyanurus</i>            | Salamandridae  | > 1 year | W1     | Asia                | 5                    | 5                        | 5                    | 3                    | 27 (24 – 28)                          | Nt                    | S                     |
| <i>Cynops pyrrhogaster</i>        | Salamandridae  | < 1 year | C2     | Asia                | 8                    | 8                        | 8                    | 4                    | 44 (15 – 105)                         | Nt                    | S                     |
| <i>Euproctus platycephalus</i>    | Salamandridae  | > 1 year | C1     | Europe              | 3                    | 3                        | 3                    | 3                    | 12 (10 – 15)                          | +                     | L                     |
| <i>Hydromantes strinatii</i>      | Plethodontidae | > 1 year | W1     | Europe              | 3                    | 3                        | 3                    | 3                    | 54 (15 – 106)                         | Nt                    | L                     |
| <i>Gyrinophilus porphyriticus</i> | Plethodontidae | > 1 year | C1     | North America       | 5                    | 0                        | 0                    | 0                    | -                                     | Nt                    | R                     |
| <i>Hynobius retardatus</i>        | Hynobiidae     | > 1 year | C1     | Asia                | 3                    | 0                        | 0                    | 0                    | -                                     | Nt                    | R                     |
| <i>Ichthyosaura alpestris</i>     | Salamandridae  | < 1 year | C2     | Europe              | 5                    | 5                        | 5                    | 5                    | 15 (8 – 26)                           | +                     | L                     |
| <i>Lissotriton helveticus</i>     | Salamandridae  | < 1 year | C2     | Europe              | 3                    | 3                        | 0                    | 0                    | -                                     | +                     | R                     |
| <i>Lissotriton italicus</i>       | Salamandridae  | < 1 year | C1     | Europe              | 5                    | 5                        | 5                    | 5                    | 10 (9-11)                             | Nt                    | L                     |
| <i>Neuregus crocatus</i>          | Salamandridae  | > 1 year | C1     | Europe              | 5                    | 5                        | 5                    | 5                    | 11 (10-11)                            | +                     | L                     |
| <i>Nothophthalmus viridescens</i> | Salamandridae  | > 1 year | W1     | North America       | 5                    | 5                        | 5                    | 5                    | 22 (20 – 34)                          | +                     | L                     |

| Amphibian species                    | Family         | Age      | Origin | Continent of origin | No used <sup>a</sup> | No Infected <sup>b</sup> | No Sick <sup>c</sup> | No Dead <sup>d</sup> | Average days to mortality (min – max) | Invasion <sup>e</sup> | Category <sup>h</sup> |
|--------------------------------------|----------------|----------|--------|---------------------|----------------------|--------------------------|----------------------|----------------------|---------------------------------------|-----------------------|-----------------------|
| <i>Pachyhynobius shangchengensis</i> | Hynobiidae     | >1 year  | C1     | Asia                | 3                    | 0                        | 0                    | 0                    | -                                     | Nt                    | R                     |
| <i>Paramesotriton deloustali</i>     | Salamandridae  | > 1 year | C1     | Asia                | 4                    | 4                        | 4                    | 3                    | 24 (21 – 27)                          | Nt                    | S                     |
| <i>Plethodon glutinosus</i>          | Plethodontidae | > 1 year | W1     | North America       | 5                    | 0                        | 0                    | 0                    | -                                     | +                     | R                     |
| <i>Pleurodeles waltl</i>             | Salamandridae  | < 1 year | C1     | Europe              | 5                    | 5                        | 5                    | 5                    | 11 (8 – 13)                           | +                     | L                     |
| <i>Salamandra salamandra</i>         | Salamandridae  | < 1 year | C3     | Europe              | 5                    | 5                        | 5                    | 5                    | 14 (12 – 15)                          | +                     | L                     |
| <i>Salamandrella keyserlingii</i>    | Hynobiidae     | > 1 year | C1     | Asia                | 3                    | 3                        | 0                    | 0                    | -                                     | Nt                    | T                     |
| <i>Salamandrina perspicillata</i>    | Salamandridae  | < 1 year | C1     | Europe              | 5                    | 5                        | 5                    | 5                    | 24 (16 – 35)                          | Nt                    | L                     |
| <i>Siren intermedia</i>              | Sirenidae      | > 1 year | C1     | North America       | 3                    | 3                        | 3                    | 0                    | -                                     | Nt                    | T                     |
| <i>Taricha granulosa</i>             | Salamandridae  | < 1 year | C1     | North America       | 4                    | 4                        | 4                    | 4                    | 28 (21 – 42)                          | Nt                    | L                     |
| <i>Triturus cristatus</i>            | Salamandridae  | < 1 year | C1     | Europe              | 5                    | 5                        | 5                    | 5                    | 34 (25 -57)                           | +                     | L                     |
| <i>Tylototriton wenxianensis</i>     | Salamandridae  | < 1 year | C1     | Asia                | 5                    | 5                        | 5                    | 5                    | 25 (20 – 31)                          | Nt                    | L                     |
| <b>Gymnophiona</b>                   |                |          |        |                     |                      |                          |                      |                      |                                       |                       |                       |
| <i>Typhlonectes compressicauda</i>   | Typhlonectidae | > 1 year | C1     | South America       | 2                    | 0                        | 0                    | 0                    | -                                     | Nt                    | R                     |

<sup>a</sup> number of animals exposed to *B. salamandrivorans*

<sup>b</sup> number of animals infected by *B. salamandrivorans*

<sup>c</sup> number of animals that developed clinical signs: anorexia, apathy and/or abnormal behaviour (preferring dry places)

<sup>d</sup> number of animals that died

<sup>e</sup> determined using skin from two animals per species, after 24h of exposure to *B. salamandrivorans*

<sup>f</sup> C captive bred; W wild caught animals, number reflects the number of source populations

<sup>g</sup> Nt not tested

<sup>h</sup> R = resistant (no infection, no disease), T = tolerant (infection in the absence of disease and mortality), S = susceptible (infection resulting in clinical disease with possibility of subsequent clinical recovery), L = lethal (infection resulting in lethal disease in all infected animals)

**Table S2. Screening of amphibian assemblages for the presence of *B. salamandrivorans*.**

| Family                    | Species                        | Country          | No tested | Years sampled | No positive (GE load) <sup>a</sup> |
|---------------------------|--------------------------------|------------------|-----------|---------------|------------------------------------|
| <b>WESTERN PALEARCTIC</b> |                                |                  |           |               |                                    |
| <b>Anura</b>              |                                |                  |           |               |                                    |
| Alytidae                  | <i>Alytes obstetricans</i>     | The Netherlands  | 15        | 2009          | 0                                  |
| Bombinatoridae            | <i>Bombina variegata</i>       | The Netherlands  | 8         | 2009          | 0                                  |
| Bufo                      | <i>Bufo bufo</i>               | Belgium          | 100       | 2011          | 0                                  |
| Bufo                      | <i>Bufo bufo</i>               | The Netherlands* | 19        | 2013          | 0                                  |
| Bufo                      | <i>Epidalea calamita</i>       | The Netherlands  | 24        | 2009          | 0                                  |
| Hylidae                   | <i>Hyla arborea</i>            | The Netherlands  | 22        | 2009          | 0                                  |
| Ranidae                   | <i>Lithobates catesbeianus</i> | Belgium          | 100       | 2010-2011     | 0                                  |
| Ranidae                   | <i>Rana temporaria</i>         | Belgium          | 7         | 2010          | 0                                  |
| Ranidae                   | <i>Rana temporaria</i>         | The Netherlands  | 73        | 2013          | 0                                  |
| <b>Urodela</b>            |                                |                  |           |               |                                    |
| Salamandridae             | <i>Calotriton arnoldi</i>      | Spain            | 5         | 2009-2012     | 0                                  |
| Salamandridae             | <i>Ichthyosaura alpestris</i>  | Belgium          | 35        | 2009          | 0                                  |
| Salamandridae             | <i>Ichthyosaura alpestris</i>  | France           | 5         | 2009          | 0                                  |
| Salamandridae             | <i>Ichthyosaura alpestris</i>  | Switzerland      | 1239      | 2008-2013     | 0                                  |
| Salamandridae             | <i>Ichthyosaura alpestris</i>  | The Netherlands* | 44        | 2013          | 1 (13)                             |
| Salamandridae             | <i>Lissotriton boscai</i>      | Spain            | 5         | 2009-2012     | 0                                  |
| Salamandridae             | <i>Lissotriton helveticus</i>  | Belgium          | 33        | 2009          | 0                                  |
| Salamandridae             | <i>Lissotriton helveticus</i>  | Spain            | 6         | 2009-2012     | 0                                  |
| Salamandridae             | <i>Lissotriton helveticus</i>  | Switzerland      | 323       | 2008-2009     | 0                                  |
| Salamandridae             | <i>Lissotriton vulgaris</i>    | Belgium          | 6         | 2008          | 0                                  |
| Salamandridae             | <i>Lissotriton vulgaris</i>    | Switzerland      | 62        | 2008-2013     | 0                                  |
| Salamandridae             | <i>Lissotriton vulgaris</i>    | The Netherlands* | 2         | 2013          | 0                                  |

| Family         | Species                          | Country         | No tested         | Years sampled | No positive (GE load) <sup>a</sup>                      |
|----------------|----------------------------------|-----------------|-------------------|---------------|---------------------------------------------------------|
| Salamandridae  | <i>Ichthyosaura alpestris</i>    | Spain           | 5                 | 2009-2012     | 0                                                       |
| Salamandridae  | <i>Mertensiella caucasica</i>    | Turkey          | 8                 | 2010          | 0                                                       |
| Salamandridae  | <i>Ommatotriton ophryticus</i>   | Turkey          | 3                 | 2010          | 0                                                       |
| Salamandridae  | <i>Salamandra algira</i>         | Morocco         | 10                | 2011          | 0                                                       |
| Salamandridae  | <i>Salamandra atra</i>           | Austria         | 122               | 2010          | 0                                                       |
| Salamandridae  | <i>Salamandra atra</i>           | Germany         | 120               | 2011-2013     | 0                                                       |
| Salamandridae  | <i>Salamandra atra</i>           | Switzerland     | 120               | 2008-2013     | 0                                                       |
| Salamandridae  | <i>Salamandra salamandra</i>     | Belgium         | 233 <sup>**</sup> | 2012-2014     | 1 <sup>***</sup> (5)<br>24 <sup>****</sup> (14(3.7-60)) |
| Salamandridae  | <i>Salamandra salamandra</i>     | France          | 9                 | 2011          | 0                                                       |
| Salamandridae  | <i>Salamandra salamandra</i>     | Spain           | 132               | 2009-2013     | 0                                                       |
| Salamandridae  | <i>Salamandra salamandra</i>     | Switzerland     | 26                | 2008-2013     | 0                                                       |
| Salamandridae  | <i>Salamandra salamandra</i>     | The Netherlands | 39                | 2010-2013     | 13 (17(4-139))                                          |
| Plethodontidae | <i>Hydromantes imperialis</i>    | Italy           | 79                | 2009-2012     | 0                                                       |
| Plethodontidae | <i>Hydromantes supramontis</i>   | Italy           | 42                | 2009-2012     | 0                                                       |
| Plethodontidae | <i>Hydromantes flavus</i>        | Italy           | 25                | 2004-2012     | 0                                                       |
| Plethodontidae | <i>Hydromantes genei</i>         | Italy           | 173               | 2009-2012     | 0                                                       |
| Plethodontidae | <i>Hydromantes sarrabusensis</i> | Italy           | 5                 | 2004-2012     | 0                                                       |
| Plethodontidae | <i>Hydromantes strinatii</i>     | Italy           | 70                | 2012-2013     | 0                                                       |
| Salamandridae  | <i>Pleurodeles waltl</i>         | Spain           | 11                | 2009-2012     | 0                                                       |
| Salamandridae  | <i>Triturus cristatus</i>        | Belgium         | 2                 | 2010          | 0                                                       |
| Salamandridae  | <i>Triturus cristatus</i>        | Switzerland     | 38                | 2008-2009     | 0                                                       |
| Salamandridae  | <i>Triturus carnifex</i>         | Switzerland     | 9                 | 2008-2009     | 0                                                       |
| Salamandridae  | <i>Triturus marmoratus</i>       | Spain           | 54                | 2009-2012     | 0                                                       |
| Salamandridae  | <i>Triturus pygmaeus</i>         | Spain           | 5                 | 2009-2012     | 0                                                       |

| Family              | Species                             | Country | No tested | Years sampled | No positive (GE load) <sup>a</sup> |
|---------------------|-------------------------------------|---------|-----------|---------------|------------------------------------|
| <b>EASTERN ASIA</b> |                                     |         |           |               |                                    |
| <b>Anura</b>        |                                     |         |           |               |                                    |
| Bombinatoridae      | <i>Bombina maxima</i>               | Vietnam | 4         | 2010          | 0                                  |
| Dicroglossidae      | <i>Fejervarya limnocharis</i>       | Vietnam | 1         | 2010          | 0                                  |
| Dicroglossidae      | <i>Limnonectes</i> sp.              | Vietnam | 4         | 2010          | 0                                  |
| Dicroglossidae      | <i>Quasipaa</i> sp.                 | Vietnam | 2         | 2010          | 0                                  |
| Megophryidae        | <i>Leptobrachium</i> sp.            | Vietnam | 2         | 2010          | 0                                  |
| Megophryidae        | <i>Leptolalax sungi</i>             | Vietnam | 3         | 2010          | 0                                  |
| Megophryidae        | <i>Megophrys</i> sp.                | Vietnam | 2         | 2010          | 0                                  |
| Megophryidae        | <i>Ophryophryne</i> sp.             | Vietnam | 3         | 2010          | 0                                  |
| Megophryidae        | <i>Xenophrys major</i>              | Vietnam | 2         | 2010          | 0                                  |
| Microhylidae        | <i>Microhyla heymonsi</i>           | Vietnam | 3         | 2010          | 0                                  |
| Microhylidae        | <i>Microhyla pulchra</i>            | Vietnam | 2         | 2010          | 0                                  |
| Microhylidae        | <i>Micryletta ornate</i>            | Vietnam | 4         | 2010          | 0                                  |
| Ranidae             | <i>Amolops</i> sp.                  | Vietnam | 3         | 2010          | 0                                  |
| Ranidae             | <i>Hylarana</i> sp.                 | Vietnam | 6         | 2010          | 0                                  |
| Ranidae             | <i>Odorrana</i> sp.                 | Vietnam | 8         | 2010          | 0                                  |
| Rhacophoridae       | <i>Kurixalus verrucosus</i>         | Vietnam | 1         | 2010          | 0                                  |
| Rhacophoridae       | <i>Polypedates leucomystax</i>      | Vietnam | 3         | 2010          | 0                                  |
| Rhacophoridae       | <i>Rhacophorus dennysi</i>          | Vietnam | 2         | 2010          | 0                                  |
| Rhacophoridae       | <i>Rhacophorus orlovi</i>           | Vietnam | 1         | 2010          | 0                                  |
| Rhacophoridae       | <i>Rhacophorus kio</i>              | Vietnam | 1         | 2010          | 0                                  |
| Rhacoporidae        | <i>Theloderma</i> sp.               | Vietnam | 1         | 2010          | 0                                  |
| <b>Urodela</b>      |                                     |         |           |               |                                    |
| Salamandridae       | <i>Cynops cyanurus chuxiogensis</i> | China   | 6         | 2013          | 0                                  |
| Salamandridae       | <i>Cynops ensicauda</i>             | Japan   | 76        | 2009          | 8 (12 (2-27))                      |
| Salamandridae       | <i>Cynops pyrrhogaster</i>          | Japan   | 116       | 2009          | 1 (10)                             |

| Family            | Species                             | Country  | No tested | Years sampled | No positive (GE load) <sup>a</sup> |
|-------------------|-------------------------------------|----------|-----------|---------------|------------------------------------|
| Salamandridae     | <i>Echinotriton andersoni</i>       | Japan    | 3         | 2009          | 0                                  |
| Salamandridae     | <i>Paramesotriton deloustali</i>    | Vietnam  | 30        | 2010-2013     | 2 (13 (9-16))                      |
| Salamandridae     | <i>Paramesotriton chinensis</i>     | China    | 3         | 2008          | 0                                  |
| Salamandridae     | <i>Paramesotriton hongkongensis</i> | China    | 1         | 2014          | 0                                  |
| Salamandridae     | <i>Paramesotriton granulosus</i>    | Chinae   | 3         | 2008          | 0                                  |
| Salamandridae     | <i>Paramesotriton longliensis</i>   | China    | 3         | 2011          | 0                                  |
| Salamandridae     | <i>Paramesotriton</i> sp.           | China    | 3         | 2014          | 0                                  |
| Salamandridae     | <i>Paramesotriton yunwuensis</i>    | China    | 2         | 2014          | 0                                  |
| Salamandridae     | <i>Tylototriton panhai</i>          | Thailand | 9         | 2003-2006     | 0                                  |
| Salamandridae     | <i>Tylototriton uyenoii</i>         | Thailand | 9         | 2001-2006     | 1 (13)                             |
| Salamandridae     | <i>Tylototriton vietnamensis</i>    | Vietnam  | 60        | 2010          | 0                                  |
| Salamandridae     | <i>Tylototriton verrucosus</i>      | Laos     | 1         | 2013          | 0                                  |
| Salamandridae     | <i>Tylototriton ziegleri</i>        | Vietnam  | 9         | 2010          | 1 (11)                             |
| Salamandridae     | <i>Tylototriton</i> cf. shanjing    | Thailand | 3         | 2006          | 0                                  |
| Salamandridae     | <i>Tylototriton</i> sp.             | Vietnam  | 3         | 2012          | 0                                  |
| Hynobiidae        | <i>Hynobius kimurae</i>             | Japan    | 5         | 2009          | 0                                  |
| Hynobiidae        | <i>Hynobius lichenatus</i>          | Japan    | 3         | 2009          | 0                                  |
| Hynobiidae        | <i>Hynobius naevius</i>             | Japan    | 2         | 2009          | 0                                  |
| Hynobiidae        | <i>Hynobius nebulosus</i>           | Japan    | 15        | 2009          | 1 (2)                              |
| Hynobiidae        | <i>Hynobius nigrescens</i>          | Japan    | 15        | 2009          | 0                                  |
| Hynobiidae        | <i>Hynobius retardatus</i>          | Japan    | 3         | 2009          | 0                                  |
| Hynobiidae        | <i>Onychodactylus japonicas</i>     | Japan    | 19        | 2009          | 1 (12)                             |
| Hynobiidae        | <i>Salamandrella keyserlingii</i>   | Japan    | 4         | 2009          | 2 (2 (2-2))                        |
| Cryptobranchidae  | <i>Andrias japonicas</i>            | Japan    | 26        | 2009          | 0                                  |
| <b>NEOTROPICS</b> |                                     |          |           |               |                                    |
| <b>Anura</b>      |                                     |          |           |               |                                    |
| Bufonidae         | <i>Atelopus glyphus</i>             | Panama   | 6         | 2007          | 0                                  |



| Family         | Species                                | Country | No tested | Years sampled | No positive (GE load) <sup>a</sup> |
|----------------|----------------------------------------|---------|-----------|---------------|------------------------------------|
| Bufonidae      | <i>Atelopus limosus</i>                | Panama  | 1         | 2007          | 0                                  |
| Bufonidae      | <i>Incilius coniferus</i>              | Panama  | 4         | 2007          | 0                                  |
| Bufonidae      | <i>Rhaebo haematiticus</i>             | Panama  | 8         | 2007          | 0                                  |
| Bufonidae      | <i>Rhinella alata</i>                  | Panama  | 14        | 2007          | 0                                  |
| Bufonidae      | <i>Rhinella marina</i>                 | Panama  | 15        | 2008          | 0                                  |
| Centrolenidae  | <i>Centrolene ilex</i>                 | Panama  | 4         | 2007          | 0                                  |
| Centrolenidae  | <i>Cochranella albomaculata</i>        | Panama  | 10        | 2007          | 0                                  |
| Centrolenidae  | <i>Cochranella euknemos</i>            | Panama  | 5         | 2007          | 0                                  |
| Centrolenidae  | <i>Cochranella spinosa</i>             | Panama  | 12        | 2007          | 0                                  |
| Centrolenidae  | <i>Cochranella pulverata</i>           | Panama  | 1         | 2007          | 0                                  |
| Centrolenidae  | <i>Espadarana prosoblepon</i>          | Panama  | 9         | 2007          | 0                                  |
| Centrolenidae  | <i>Hyalinobatrachium colymbiphllum</i> | Panama  | 11        | 2007          | 0                                  |
| Centrolenidae  | <i>Hyalinobatrachium fleischmanni</i>  | Panama  | 9         | 2008          | 0                                  |
| Craugastoridae | <i>Craugastor bransfordii</i>          | Panama  | 2         | 2007          | 0                                  |
| Craugastoridae | <i>Craugastor crassidigitus</i>        | Panama  | 10        | 2007          | 0                                  |
| Craugastoridae | <i>Craugastor fitzingeri</i>           | Panama  | 26        | 2007-2008     | 0                                  |
| Craugastoridae | <i>Craugastor gollmeri</i>             | Panama  | 3         | 2007          | 0                                  |
| Craugastoridae | <i>Craugastor megacephalus</i>         | Panama  | 1         | 2007          | 0                                  |
| Craugastoridae | <i>Craugastor noblei</i>               | Panama  | 3         | 2007          | 0                                  |
| Craugastoridae | <i>Craugastor raniformis</i>           | Panama  | 9         | 2008          | 0                                  |
| Craugastoridae | <i>Craugastor tabasarae</i>            | Panama  | 1         | 2007          | 0                                  |
| Craugastoridae | <i>Craugastor talamancae</i>           | Panama  | 22        | 2007          | 0                                  |
| Dendrobatidae  | <i>Allobates talamancae</i>            | Panama  | 1         | 2007          | 0                                  |
| Dendrobatidae  | <i>Colestethus flotator</i>            | Panama  | 1         | 2007          | 0                                  |
| Dendrobatidae  | <i>Colestethus panamensis</i>          | Panama  | 4         | 2007          | 0                                  |
| Dendrobatidae  | <i>Colostethus pratti</i>              | Panama  | 5         | 2007          | 0                                  |
| Dendrobatidae  | <i>Colostethus</i> sp.                 | Panama  | 2         | 2007          | 0                                  |
| Dendrobatidae  | <i>Dendrobates auratus</i>             | Panama  | 8         | 2007          | 0                                  |

| Family              | Species                            | Country | No tested | Years sampled | No positive (GE load) <sup>a</sup> |
|---------------------|------------------------------------|---------|-----------|---------------|------------------------------------|
| Dendrobatidae       | <i>Silverstoneia nubicola</i>      | Panama  | 5         | 2007          | 0                                  |
| Eleutherodactylidae | <i>Diasporus diastema</i>          | Panama  | 18        | 2007          | 0                                  |
| Eleutherodactylidae | <i>Diasporus orange</i>            | Panama  | 3         | 2007          | 0                                  |
| Eleutherodactylidae | <i>Diasporus quidditus</i>         | Panama  | 7         | 2007          | 0                                  |
| Eleutherodactylidae | <i>Eleutherodactylus sp.</i>       | Panama  | 1         | 2007          | 0                                  |
| Hemiphractidae      | <i>Hemiphractus fasciatus</i>      | Panama  | 1         | 2007          | 0                                  |
| Hemiphractidae      | <i>Gastrotheca cornuta</i>         | Panama  | 2         | 2007          | 0                                  |
| Hylidae             | <i>Agalychnis callidryas</i>       | Panama  | 7         | 2007-2008     | 0                                  |
| Hylidae             | <i>Dendropsophus sp.</i>           | Panama  | 2         | 2008          | 0                                  |
| Hylidae             | <i>Hyloscirtus colymba</i>         | Panama  | 1         | 2007          | 0                                  |
| Hylidae             | <i>Hypsiboas boans</i>             | Panama  | 1         | 2007          | 0                                  |
| Hylidae             | <i>Hypsiboas rufitelus</i>         | Panama  | 1         | 2007          | 0                                  |
| Hylidae             | <i>Hypsiboas rosenbergi</i>        | Panama  | 2         | 2007          | 0                                  |
| Hylidae             | <i>Scinax rostratus</i>            | Panama  | 1         | 2008          | 0                                  |
| Hylidae             | <i>Scinax ruber</i>                | Panama  | 7         | 2008          | 0                                  |
| Hylidae             | <i>Smilisca phaeota</i>            | Panama  | 19        | 2007          | 0                                  |
| Hylidae             | <i>Smilisca sila</i>               | Panama  | 2         | 2007          | 0                                  |
| Hylidae             | <i>Trachycephalus typhonius</i>    | Panama  | 15        | 2008          | 0                                  |
| Hylinae             | <i>Hyloscirtus palmeri</i>         | Panama  | 1         | 2007          | 0                                  |
| Leptodactylidae     | <i>Engystomops pustulosus</i>      | Panama  | 30        | 2007          | 0                                  |
| Leptodactylidae     | <i>Leptodactylus bolivianus</i>    | Panama  | 1         | 2008          | 0                                  |
| Leptodactylidae     | <i>Leptodactylus fragilis</i>      | Panama  | 1         | 2007          | 0                                  |
| Leptodactylidae     | <i>Leptodactylus labialis</i>      | Panama  | 6         | 2007          | 0                                  |
| Leptodactylidae     | <i>Leptodactylus poecilochilus</i> | Panama  | 3         | 2008          | 0                                  |
| Leptodactylidae     | <i>Leptodactylus savagei</i>       | Panama  | 2         | 2008          | 0                                  |
| Microhylidae        | <i>Elachistocleis panamensis</i>   | Panama  | 9         | 2008          | 0                                  |
| Ranidae             | <i>Lithobates warszewitschii</i>   | Panama  | 2         | 2007          | 0                                  |
| Strabomantidae      | <i>Pristimantis achatinus</i>      | Panama  | 2         | 2008          | 0                                  |

| Family          | Species                             | Country  | No tested | Years sampled | No positive (GE load) <sup>a</sup> |
|-----------------|-------------------------------------|----------|-----------|---------------|------------------------------------|
| Strabomantidae  | <i>Pristimantis caryophyllaceus</i> | Panama   | 24        | 2007          | 0                                  |
| Strabomantidae  | <i>Pristimantis cerasinus</i>       | Panama   | 23        | 2007          | 0                                  |
| Strabomantidae  | <i>Pristimantis cruentus</i>        | Panama   | 24        | 2007-2008     | 0                                  |
| Strabomantidae  | <i>Pristimantis gaigei</i>          | Panama   | 3         | 2007          | 0                                  |
| Strabomantidae  | <i>Pristimantis museosus</i>        | Panama   | 1         | 2007          | 0                                  |
| Strabomantidae  | <i>Pristimantis pardalis</i>        | Panama   | 8         | 2007          | 0                                  |
| Strabomantidae  | <i>Pristimantis pirrensis</i>       | Panama   | 1         | 2007          | 0                                  |
| Strabomantidae  | <i>Pristimantis taeniatus</i>       | Panama   | 2         | 2007          | 0                                  |
| Strabomantidae  | <i>Strabomantis bufoniformis</i>    | Panama   | 27        | 2007          | 0                                  |
| <b>Urodela</b>  |                                     |          |           |               |                                    |
| Plethodontidae  | <i>Bolitoglossa</i> sp.             | Panama   | 8         | 2007          | 0                                  |
| <b>NEARCTIC</b> |                                     |          |           |               |                                    |
| <b>Anura</b>    |                                     |          |           |               |                                    |
| Bufo            | <i>Anaxyrus americanus</i>          | Illinois | 8         | 2008-2009     | 0                                  |
| Hylidae         | <i>Acris crepitans</i>              | Illinois | 8         | 2008-2009     | 0                                  |
| Hylidae         | <i>Hyla avivoca</i>                 | Illinois | 8         | 2008-2009     | 0                                  |
| Hylidae         | <i>Hyla chrysoscelis</i>            | Illinois | 8         | 2008-2009     | 0                                  |
| Hylidae         | <i>Hyla cinerea</i>                 | Illinois | 8         | 2008-2009     | 0                                  |
| Hylidae         | <i>Hyla versicolor</i>              | New York | 16        | 2011          | 0                                  |
| Hylidae         | <i>Pseudarcis crucifer</i>          | Illinois | 8         | 2008-2009     | 0                                  |
| Hylidae         | <i>Pseudacris crucifer</i>          | New York | 47        | 2011          | 0                                  |
| Hylidae         | <i>Pseudarcis feriarum</i>          | Illinois | 5         | 2008-2009     | 0                                  |
| Hylidae         | <i>Pseudarcis triseriata</i>        | Illinois | 8         | 2008-2009     | 0                                  |
| Ranidae         | <i>Lithobates areolatus</i>         | Illinois | 22        | 2008-2009     | 0                                  |
| Ranidae         | <i>Lithobates catesbeianus</i>      | Illinois | 8         | 2008-2009     | 0                                  |
| Ranidae         | <i>Lithobates catesbeianus</i>      | New York | 7         | 2011          | 0                                  |
| Ranidae         | <i>Lithobates clamitans</i>         | Illinois | 8         | 2008-2009     | 0                                  |

| Family         | Species                              | Country      | No tested | Years sampled | No positive (GE load) <sup>a</sup> |
|----------------|--------------------------------------|--------------|-----------|---------------|------------------------------------|
| Ranidae        | <i>Lithobates clamitans</i>          | New York     | 8         | 2011          | 0                                  |
| Ranidae        | <i>Lithobates pipiens</i>            | Illinois     | 16        | 2008-2009     | 0                                  |
| Ranidae        | <i>Lithobates pipiens</i>            | New York     | 1         | 2011          | 0                                  |
| Ranidae        | <i>Lithobates septentriona</i>       | New York     | 1         | 2011          | 0                                  |
| Ranidae        | <i>Lithobates sphenoccephalus</i>    | Illinois     | 8         | 2008-2009     | 0                                  |
| Ranidae        | <i>Lithobates yavapaiensis</i>       | Arizona      | 38        | 2009          | 0                                  |
| <b>Urodela</b> |                                      |              |           |               |                                    |
| Ambystomatidae | <i>Ambystoma jeffersonianum</i>      | New York     | 3         | 2011          | 0                                  |
| Ambystomatidae | <i>Ambystoma maculatum</i>           | New York     | 8         | 2011          | 0                                  |
| Ambystomatidae | <i>Ambystoma texanum</i>             | Illinois     | 9         | 2008          | 0                                  |
| Plethodontidae | <i>Desmognathus imitator</i>         | Appalachians | 24        | 2009-2011     | 0                                  |
| Plethodontidae | <i>Desmognathus ocoee</i>            | Appalachians | 20        | 2009-2011     | 0                                  |
| Plethodontidae | <i>Desmognathus wrighti</i>          | Appalachians | 26        | 2009-2011     | 0                                  |
| Plethodontidae | <i>Eurycea wilderae</i>              | Appalachians | 11        | 2009-2011     | 0                                  |
| Plethodontidae | <i>Plethodon cinereus</i>            | Appalachians | 343       | 2009-2011     | 0                                  |
| Plethodontidae | <i>Plethodon cinereus</i>            | New York     | 3         | 2011          | 0                                  |
| Plethodontidae | <i>Plethodon cylindraceus</i>        | Appalachians | 15        | 2009-2011     | 0                                  |
| Plethodontidae | <i>Plethodon glutinosus</i>          | Appalachians | 54        | 2009-2011     | 0                                  |
| Plethodontidae | <i>Plethodon jordani</i>             | Appalachians | 35        | 2009-2011     | 0                                  |
| Plethodontidae | <i>Plethodon jor x met</i>           | Appalachians | 47        | 2009-2011     | 0                                  |
| Plethodontidae | <i>Plethodon jor x tey</i>           | Appalachians | 6         | 2009-2011     | 0                                  |
| Plethodontidae | <i>Plethodon metcalfi</i>            | Tennessee    | 8         | 2009-2011     | 0                                  |
| Plethodontidae | <i>Plethodon raceus x glutinosus</i> | Appalachians | 1         | 2009-2011     | 0                                  |
| Plethodontidae | <i>Plethodon richmondi</i>           | Appalachians | 12        | 2009-2011     | 0                                  |
| Plethodontidae | <i>Plethodon serratus</i>            | Appalachians | 14        | 2009-2011     | 0                                  |
| Plethodontidae | <i>Plethodon teyahalee</i>           | Appalachians | 21        | 2009-2011     | 0                                  |
| Plethodontidae | <i>Plethodon welleri</i>             | Appalachians | 8         | 2009-2011     | 0                                  |

| Family         | Species                          | Country      | No tested | Years sampled | No positive (GE load) <sup>a</sup> |
|----------------|----------------------------------|--------------|-----------|---------------|------------------------------------|
| Plethodontidae | <i>Plethodon yonahlossee</i>     | Appalachians | 8         | 2009-2011     | 0                                  |
| Salamandridae  | <i>Notophthalmus viridescens</i> | Illinois     | 19        | 2009-2011     | 0                                  |
| Salamandridae  | <i>Notophthalmus viridescens</i> | New York     | 12        | 2011          | 0                                  |

<sup>a</sup> (GE number per qPCR reaction (minimum GE number – maximum GE number); all positive samples were sequenced in triplicate and showed a 100% identity with Genbank accession number KC762295

\* sampled in the outbreak area Bunderbos

\*\* three samples from outbreak area in Eupen, Belgium, 60 samples from outbreak area in Robertville, Belgium.

\*\*\* from outbreak area Eupen, Belgium.

\*\*\*\* from outbreak area Robertville, Belgium

**Table S3. Summary of the *B. salamandrivorans* survey data, for each area and taxonomic group based on the data of Supplementary Table 2.** The table lists the number of individuals that were tested, the number that were *B. salamandrivorans*-positive, *B. salamandrivorans* prevalence (proportion infected), the Clopper-Pearson 95% confidence interval (CI) for prevalence and the probability of detecting at least one positive individual (assuming a prevalence of 1%).

| Area                                                  | Taxonomic group | Number tested | Number positive | Proportion infected | Clopper-Pearson 95% CI | Probability of detecting at least 1 positive individual (assuming prevalence = 0.01) |
|-------------------------------------------------------|-----------------|---------------|-----------------|---------------------|------------------------|--------------------------------------------------------------------------------------|
| Netherlands, Belgium                                  | urodelans       | 394           | 39              | 0.0901              | 0.0648 – 0.1211        | 0.9871                                                                               |
| Western Palearctic (Netherlands and Belgium excluded) | urodelans       | 2711          | 0               | 0.0000              | 0.0000 - 0.0014        | 1.0000                                                                               |
| Western Palearctic                                    | anurans         | 368           | 0               | 0.0000              | 0.0000 - 0.0100        | 0.9752                                                                               |
| Eastern Asia                                          | anurans         | 58            | 0               | 0.0000              | 0.0000 - 0.0616        | 0.4417                                                                               |
| Eastern Asia                                          | urodelans       | 432           | 17              | 0.0379              | 0.0222 – 0.0599        | 0.9890                                                                               |
| Neotropics                                            | anurans         | 472           | 0               | 0.0000              | 0.0000 - 0.0078        | 0.9913                                                                               |
| Neotropics                                            | urodelans       | 8             | 0               | 0.0000              | 0.0000 - 0.3694        | 0.0773                                                                               |
| Nearctic                                              | anurans         | 241           | 0               | 0.0000              | 0.0000 - 0.0152        | 0.9113                                                                               |
| Nearctic                                              | urodelans       | 707           | 0               | 0.0000              | 0.0000 - 0.0052        | 0.9992                                                                               |

The probability of detecting at least 1 positive individual, D, (assuming prevalence = 0.01) was calculated using the equation:  $D = 1 - (1-p)^n$  where p is prevalence and n is the number of individuals tested (39).

**Table S4. Presence of *B. salamandrivorans* in toe clips from Asian archived specimens.**

| <b>Family</b> | <b>Species</b>                      | <b>Year of deposition</b> | <b>No tested</b> | <b>No positive</b> |
|---------------|-------------------------------------|---------------------------|------------------|--------------------|
| Salamandridae | <i>Cynops ensicauda</i> *           | 1861                      | 10               | 1                  |
| Salamandridae | <i>Cynops pyrrhogaster</i>          | unknown                   | 3                | 0                  |
| Salamandridae | <i>Cynops pyrrhogaster</i>          | 1967                      | 1                | 0                  |
| Salamandridae | <i>Cynops pyrrhogaster</i>          | 2009                      | 1                | 0                  |
| Salamandridae | <i>Pachytriton sp.</i>              | 1928                      | 1                | 0                  |
| Salamandridae | <i>Paramesotriton hongkongensis</i> | 1957                      | 1                | 0                  |
| Salamandridae | <i>Tylototriton verrucosus</i>      | 1965                      | 2                | 0                  |
| Salamandridae | <i>Tylototriton verrucosus</i>      | 1966                      | 2                | 0                  |
| Salamandridae | <i>Tylototriton verrucosus</i>      | 1967                      | 2                | 0                  |

\* all animals were kept in one container, 2 animals showed ulcerations.

**Table S5. Presence of *B. salamandrivorans* in skins swabs from amphibians in trade.**

| Family         | Species                           | Continent of origin | Trade origin <sup>a</sup> | Number of samples tested | Number of samples positive |
|----------------|-----------------------------------|---------------------|---------------------------|--------------------------|----------------------------|
| <b>Anura</b>   |                                   |                     |                           |                          |                            |
| Alytidae       | <i>Alytes obstetricans</i>        | Europe              | Pet shop                  | 3                        | 0                          |
| Arthroleptidae | <i>Leptopelis argenteus</i>       | Africa              | Airport                   | 28                       | 0                          |
| Bombinatoridae | <i>Bombina orientalis</i>         | Asia                | Pet shop                  | 20                       | 0                          |
| Bombinatoridae | <i>Bombina orientalis</i>         | Asia                | Airport                   | 38                       | 0                          |
| Bombinatoridae | <i>Bombina variegata</i>          | Europe              | Pet shop                  | 9                        | 0                          |
| Brevicipitidae | <i>Breviceps adspersus</i>        | Africa              | Airport                   | 3                        | 0                          |
| Bufonidae      | <i>Anaxyrus debilis</i>           | North America       | Pet shop                  | 4                        | 0                          |
| Bufonidae      | <i>Amietophrynus rangeri</i>      | South America       | Airport                   | 12                       | 0                          |
| Bufonidae      | <i>Amietophrynus regularis</i>    | Africa              | Airport                   | 61                       | 0                          |
| Bufonidae      | <i>Bufotes viridis</i>            | Africa              | Pet shop                  | 2                        | 0                          |
| Bufonidae      | <i>Bufotes viridis</i>            | Africa              | Airport                   | 37                       | 0                          |
| Bufonidae      | <i>Duttaphrynus melanostictus</i> | Asia                | Pet shop                  | 10                       | 0                          |
| Bufonidae      | <i>Incilius alvarius</i>          | North America       | Pet shop                  | 4                        | 0                          |
| Bufonidae      | <i>Melanophryniscus stelzneri</i> | South America       | Pet shop                  | 15                       | 0                          |
| Bufonidae      | <i>Rhinella marina</i>            | Americas            | Airport                   | 2                        | 0                          |
| Bufonidae      | <i>Schismaderma carens</i>        | Africa              | Airport                   | 1                        | 0                          |
| Ceratophryidae | <i>Ceratophrys cornuta</i>        | South America       | Airport                   | 6                        | 0                          |
| Ceratophryidae | <i>Ceratophrys cranwelli</i>      | South America       | Airport                   | 81                       | 0                          |
| Ceratophryidae | <i>Ceratophrys ornata</i>         | South America       | Airport                   | 15                       | 0                          |
| Ceratophryidae | <i>Lepidobatrachus laevis</i>     | South America       | Airport                   | 15                       | 0                          |
| Dendrobatidae  | <i>Dendrobates tinctorius</i>     | South America       | Pet shop                  | 5                        | 0                          |
| Dendrobatidae  | <i>Dendrobates tinctorius</i>     | South America       | Airport                   | 2                        | 0                          |
| Hemisotidae    | <i>Hemisus marmoratus</i>         | Africa              | Airport                   | 2                        | 0                          |
| Hylidae        | <i>Agalychnis callidryas</i>      | South America       | Pet shop                  | 13                       | 0                          |



| Family       | Species                             | Continent of origin | Trade origin <sup>a</sup> | Number of samples tested | Number of samples positive |
|--------------|-------------------------------------|---------------------|---------------------------|--------------------------|----------------------------|
| Hylidae      | <i>Agalychnis callidryas</i>        | North America       | Airport                   | 7                        | 0                          |
| Hylidae      | <i>Dendropsophus leucophyllatus</i> | South America       | Airport                   | 2                        | 0                          |
| Hylidae      | <i>Hyla chrysoscelis</i>            | North America       | Airport                   | 7                        | 0                          |
| Hylidae      | <i>Hyla cinerea</i>                 | North America       | Pet shop                  | 37                       | 0                          |
| Hylidae      | <i>Hyla cinerea</i>                 | North America       | Airport                   | 34                       | 0                          |
| Hylidae      | <i>Hyla gratiosa</i>                | North America       | Airport                   | 6                        | 0                          |
| Hylidae      | <i>Hyla versicolor</i>              | North America       | Pet shop                  | 19                       | 0                          |
| Hylidae      | <i>Hyla</i> sp.                     | unknown             | Airport                   | 14                       | 0                          |
| Hylidae      | <i>Hypsiboas calcaratus</i>         | South America       | Airport                   | 2                        | 0                          |
| Hylidae      | <i>Litoria caerulea</i>             | Australia/Asia      | Airport                   | 19                       | 0                          |
| Hylidae      | <i>Litoria infrafrenata</i>         | Australia/Asia      | Airport                   | 8                        | 0                          |
| Hylidae      | <i>Litoria</i> sp.                  | unknown             | Airport                   | 29                       | 0                          |
| Hylidae      | <i>Phyllomedusa bicolor</i>         | South America       | Airport                   | 2                        | 0                          |
| Hylidae      | <i>Phyllomedusa hypochondrialis</i> | South America       | Airport                   | 2                        | 0                          |
| Hylidae      | <i>Pseudacris crucifer</i>          | North America       | Airport                   | 2                        | 0                          |
| Hylidae      | <i>Tachycephalus resinifinctor</i>  | South America       | Airport                   | 3                        | 0                          |
| Hylidae      | <i>Trachycephalus resinifinctor</i> | South America       | Pet shop                  | 10                       | 0                          |
| Hyperoliidae | <i>Afrixalus fornasini</i>          | Africa              | Airport                   | 6                        | 0                          |
| Hyperoliidae | <i>Heterixalus alboguttatus</i>     | Africa              | Airport                   | 3                        | 0                          |
| Hyperoliidae | <i>Heterixalus madagascariensis</i> | Africa              | Airport                   | 3                        | 0                          |
| Hyperoliidae | <i>Heterixalus punctatus</i>        | Africa              | Airport                   | 3                        | 0                          |
| Hyperoliidae | <i>Hyperolius argus</i>             | Africa              | Airport                   | 23                       | 0                          |
| Hyperoliidae | <i>Hyperolius concolor</i>          | Africa              | Airport                   | 17                       | 0                          |
| Hyperoliidae | <i>Hyperolius guttulatus</i>        | Africa              | Pet shop                  | 2                        | 0                          |
| Hyperoliidae | <i>Hyperolius marmoratus</i>        | Africa              | Airport                   | 26                       | 0                          |
| Hyperoliidae | <i>Hyperolius parkeri</i>           | Africa              | Pet shop                  | 3                        | 0                          |
| Hyperoliidae | <i>Hyperolius picturatus</i>        | Africa              | Airport                   | 6                        | 0                          |
| Hyperoliidae | <i>Hyperolius puncticulatus</i>     | Africa              | Airport                   | 20                       | 0                          |

| Family       | Species                               | Continent of origin | Trade origin <sup>a</sup> | Number of samples tested | Number of samples positive |
|--------------|---------------------------------------|---------------------|---------------------------|--------------------------|----------------------------|
| Hyperoliidae | <i>Hyperolius tuberilingus</i>        | Africa              | Airport                   | 5                        | 0                          |
| Hyperoliidae | <i>Hyperolius viridiflavus</i>        | Africa              | Airport                   | 19                       | 0                          |
| Hyperoliidae | <i>Hyperolius</i> sp.                 | unknown             | Airport                   | 79                       | 0                          |
| Hyperoliidae | <i>Kassina maculate</i>               | South America       | Pet shop                  | 2                        | 0                          |
| Hyperoliidae | <i>Kassina maculata</i>               | South America       | Airport                   | 22                       | 0                          |
| Hyperoliidae | <i>Kassina senegalensis</i>           | Africa              | Pet shop                  | 2                        | 0                          |
| Hyperoliidae | <i>Kassina senegalensis</i>           | Africa              | Airport                   | 13                       | 0                          |
| Mantellidae  | <i>Mantella aurantiaca</i>            | Africa              | Airport                   | 2                        | 0                          |
| Mantellidae  | <i>Mantella baroni</i>                | Africa              | Airport                   | 8                        | 0                          |
| Mantellidae  | <i>Mantella betsileo</i>              | Africa              | Pet shop                  | 4                        | 0                          |
| Mantellidae  | <i>Mantella betsileo</i>              | Africa              | Airport                   | 4                        | 0                          |
| Mantellidae  | <i>Mantella laevigata</i>             | Africa              | Airport                   | 1                        | 0                          |
| Mantellidae  | <i>Mantella madagascarensis</i>       | Africa              | Airport                   | 4                        | 0                          |
| Mantellidae  | <i>Mantella nigricans</i>             | Africa              | Airport                   | 4                        | 0                          |
| Mantellidae  | <i>Mantella pulchra</i>               | Africa              | Airport                   | 6                        | 0                          |
| Megophryidae | <i>Megophrys montana</i>              | Asia                | Airport                   | 3                        | 0                          |
| Megophryidae | <i>Megophrys nasuta</i>               | Asia                | Pet shop                  | 9                        | 0                          |
| Megophryidae | <i>Megophrys nasuta</i>               | Asia                | Airport                   | 8                        | 0                          |
| Microhylidae | <i>Dyscophus guineti</i>              | Africa              | Pet shop                  | 10                       | 0                          |
| Microhylidae | <i>Dyscophus guineti</i>              | Africa              | Airport                   | 31                       | 0                          |
| Microhylidae | <i>Dyscophus insularis</i>            | Africa              | Airport                   | 4                        | 0                          |
| Microhylidae | <i>Kaloula pulchra</i>                | Asia                | Pet shop                  | 6                        | 0                          |
| Microhylidae | <i>Kaloula pulchra</i>                | Asia                | Airport                   | 9                        | 0                          |
| Microhylidae | <i>Phrynomantis bifasciatus</i>       | Africa              | Airport                   | 57                       | 0                          |
| Microhylidae | <i>Scaphiophryne gottlebei</i>        | Africa              | Airport                   | 2                        | 0                          |
| Microhylidae | <i>Scaphiophryne madagascariensis</i> | Africa              | Airport                   | 2                        | 0                          |
| Microhylidae | <i>Scaphiophryne marmorata</i>        | Africa              | Airport                   | 2                        | 0                          |
| Pipidae      | <i>Hymenochirus boettgeri</i>         | Africa              | Pet shop                  | 15                       | 0                          |

| Family         | Species                          | Continent of origin | Trade origin <sup>a</sup> | Number of samples tested | Number of samples positive |
|----------------|----------------------------------|---------------------|---------------------------|--------------------------|----------------------------|
| Pipidae        | <i>Xenopus laevis</i>            | Africa              | Airport                   | 63                       | 0                          |
| Ptychadenidae  | <i>Ptychadena mascareniensis</i> | Africa              | Airport                   | 4                        | 0                          |
| Pyxicephalidae | <i>Pyxicephalus adspersus</i>    | Africa              | Pet shop                  | 13                       | 0                          |
| Pyxicephalidae | <i>Pyxicephalus adspersus</i>    | Africa              | Airport                   | 37                       | 0                          |
| Pyxicephalidae | <i>Tomopterna marmorata</i>      | Africa              | Airport                   | 4                        | 0                          |
| Rhacophoridae  | <i>Chiromantis xerampelina</i>   | Africa              | Pet shop                  | 8                        | 0                          |
| Rhacophoridae  | <i>Chiromantis xerampelina</i>   | Africa              | Airport                   | 3                        | 0                          |
| Rhacophoridae  | <i>Polypedates leucomystax</i>   | Asia                | Pet shop                  | 10                       | 0                          |
| Rhacophoridae  | <i>Polypedates otilopus</i>      | Asia                | Airport                   | 9                        | 0                          |
| Rhacophoridae  | <i>Rhacophorus dennysi</i>       | Asia                | Pet shop                  | 1                        | 0                          |
| Rhacophoridae  | <i>Rhacophorus dennysi</i>       | Asia                | Airport                   | 6                        | 0                          |
| Rhacophoridae  | <i>Rhacophorus nigropalmatus</i> | Asia                | Airport                   | 2                        | 0                          |
| Rhacophoridae  | <i>Rhacophorus prominanus</i>    | Asia                | Airport                   | 10                       | 0                          |
| Rhacophoridae  | <i>Theloderma asperum</i>        | Asia                | Pet shop                  | 7                        | 0                          |
| Rhacophoridae  | <i>Theloderma corticale</i>      | Asia                | Airport                   | 6                        | 0                          |
| Rhacophoridae  | <i>Theloderma corticale</i>      | Asia                | Pet shop                  | 4                        | 0                          |
| <b>Urodela</b> |                                  |                     |                           |                          |                            |
| Ambystomatidae | <i>Ambystoma maculatum</i>       | North America       | Pet shop                  | 11                       | 0                          |
| Ambystomatidae | <i>Ambystoma maculatum</i>       | North America       | Airport                   | 9                        | 0                          |
| Ambystomatidae | <i>Ambystoma mexicanum</i>       | South America       | Pet shop                  | 10                       | 0                          |
| Ambystomatidae | <i>Ambystoma opacum</i>          | North America       | Pet shop                  | 14                       | 0                          |
| Ambystomatidae | <i>Ambystoma opacum</i>          | North America       | Airport                   | 3                        | 0                          |
| Ambystomatidae | <i>Ambystoma tigrinum</i>        | North America       | Pet shop                  | 25                       | 0                          |
| Plethodontidae | <i>Desmognathus auriculatus</i>  | North America       | Airport                   | 4                        | 0                          |
| Proteidae      | <i>Necturus maculosus</i>        | North America       | Pet shop                  | 7                        | 0                          |
| Salamandridae  | <i>Cynops cyanurus</i>           | Asia                | Pet shop                  | 24                       | 0                          |
| Salamandridae  | <i>Cynops cyanurus</i>           | Asia                | Airport                   | 5                        | 0                          |

| Family             | Species                             | Continent of origin | Trade origin <sup>a</sup> | Number of samples tested | Number of samples positive |
|--------------------|-------------------------------------|---------------------|---------------------------|--------------------------|----------------------------|
| Salamandridae      | <i>Cynops orientalis</i>            | Asia                | Pet shop                  | 68                       | 0                          |
| Salamandridae      | <i>Cynops orientalis</i>            | Asia                | Airport                   | 5                        | 0                          |
| Salamandridae      | <i>Cynops orientalis</i>            | Asia                | Exporter                  | 72                       | 0                          |
| Salamandridae      | <i>Cynops pyrrhogaster</i>          | Asia                | Pet shop                  | 11                       | 0                          |
| Salamandridae      | <i>Ichthyosaura alpestris</i>       | Europe              | Pet shop                  | 12                       | 0                          |
| Salamandridae      | <i>Notophthalmus viridescens</i>    | North America       | Pet shop                  | 14                       | 0                          |
| Salamandridae      | <i>Paramesotriton hongkongensis</i> | Asia                | Pet shop                  | 11                       | 0                          |
| Salamandridae      | <i>Paramesotriton hongkongensis</i> | Asia                | Exporter                  | 72                       | 0                          |
| Salamandridae      | <i>Paramesotriton labiatus</i>      | Asia                | Pet shop                  | 16                       | 0                          |
| Salamandridae      | <i>Paramesotriton labiatus</i>      | Asia                | Airport                   | 2                        | 0                          |
| Salamandridae      | <i>Pleurodeles waltl</i>            | Europe              | Pet shop                  | 41                       | 0                          |
| Salamandridae      | <i>Salamandra salamandra</i>        | Europe              | Pet shop                  | 21                       | 0                          |
| Salamandridae      | <i>Salamandra salamandra</i>        | Europe              | Airport                   | 12                       | 0                          |
| Salamandridae      | <i>Triturus marmoratus</i>          | Europe              | Pet shop                  | 4                        | 0                          |
| Salamandridae      | <i>Tylototriton asperrimus</i>      | Asia                | Pet shop                  | 8                        | 0                          |
| Salamandridae      | <i>Tylototriton kweichowensis</i>   | Asia                | Pet shop                  | 11                       | 0                          |
| Salamandridae      | <i>Tylototriton shanjing</i>        | Asia                | Pet shop                  | 45                       | 0                          |
| Sirenidae          | <i>Siren intermedia</i>             | North America       | Pet shop                  | 1                        | 0                          |
| Sirenidae          | <i>Siren lacertina</i>              | North America       | Airport                   | 2                        | 0                          |
| Sirenidae          | <i>Siren lacertina</i>              | North America       | Pet shop                  | 2                        | 0                          |
| <b>Gymnophiona</b> |                                     |                     |                           |                          |                            |
| Dermophiidae       | <i>Geotrypetes seraphini</i>        | Africa              | Pet shop                  | 2                        | 0                          |

**Table S6. Summary of the *B. salamandrivorans* survey of amphibians in the trade.** The table lists the number of individuals that were tested, the number that were *B. salamandrivorans*-positive, *B. salamandrivorans* prevalence (proportion infected) and the Clopper-Pearson 95% confidence interval (CI) for prevalence.

| <b>Taxonomic group</b> | <b>Number tested</b> | <b>Number positive</b> | <b>Proportion infected</b> | <b>Clopper-Pearson 95% CI</b> | <b>Probability of detecting at least 1 positive individual (assuming prevalence = 0.01)</b> |
|------------------------|----------------------|------------------------|----------------------------|-------------------------------|---------------------------------------------------------------------------------------------|
| urodelans              | 542                  | 0                      | 0                          | 0.0000-0.0068                 | 0.9681                                                                                      |
| anurans                | 1221                 | 0                      | 0                          | 0.0000-0.0030                 | 0.9765                                                                                      |

**Table S7. Presence of *B. salamandrivorans* in skin swabs from captive kept amphibians.**

| <b>Family</b>    | <b>Species</b>                      | <b>Continent of origin</b> | <b>No tested</b> | <b>No positive</b> |
|------------------|-------------------------------------|----------------------------|------------------|--------------------|
| <b>Anura</b>     |                                     |                            |                  |                    |
| Bufonidae        | <i>Atelopus hoogmoedi</i>           | South America              | 1                | 0                  |
| Bufonidae        | <i>Barbarophryne brongersmai</i>    | Africa                     | 1                | 0                  |
| Bombinatoridae   | <i>Bombina variegata</i>            | Europe                     | 17               | 0                  |
| Dendrobatidae    | <i>Dendrobates auratus</i>          | South America              | 6                | 0                  |
| Dendrobatidae    | <i>Dendrobates leucomelas</i>       | South America              | 2                | 0                  |
| Dendrobatidae    | <i>Dendrobates tinctorius</i>       | South America              | 33               | 0                  |
| Dendrobatidae    | <i>Oophaga pumilio</i>              | South America              | 14               | 0                  |
| Dendrobatidae    | <i>Phyllobates terribilis</i>       | South America              | 16               | 0                  |
| Dendrobatidae    | <i>Ranitomeya reticulata</i>        | South America              | 2                | 0                  |
| Discoglossidae   | <i>Discoglossus pictus</i>          | Africa                     | 6                | 0                  |
| Hemiphractidae   | <i>Gastrotheca riobambae</i>        | South America              | 1                | 0                  |
| Hylidae          | <i>Hyla eximia</i>                  | North America              | 2                | 0                  |
| Hylidae          | <i>Agalychnis callidryas</i>        | South America              | 1                | 0                  |
| Hylidae          | <i>Hyla arborea</i>                 | Europe                     | 19               | 0                  |
| Hylidae          | <i>Litoria aurea</i>                | Asia                       | 3                | 0                  |
| Hylidae          | <i>Litoria caerulea</i>             | Asia                       | 1                | 0                  |
| Hylidae          | <i>Litoria infrafrenata</i>         | Asia                       | 1                | 0                  |
| Hylidae          | <i>Trachycephalus resinifictrix</i> | South America              | 2                | 0                  |
| Hyperoliidae     | <i>Hyperolius puncticulatus</i>     | Africa                     | 5                | 0                  |
| Leptodactylidae  | <i>Eleutherodactylus montanus</i>   | South America              | 2                | 0                  |
| Leptodactylidae  | <i>Leptodactylus fallax</i>         | South America              | 1                | 0                  |
| Microhylidae     | <i>Dyscophus guineti</i>            | Africa                     | 1                | 0                  |
| Pipidae          | <i>Silurana tropicalis</i>          | Africa                     | 5                | 0                  |
| Pipidae          | <i>Xenopus laevis</i>               | Africa                     | 16               | 0                  |
| Rhacophoridae    | <i>Rhacophorus dennysi</i>          | Asia                       | 1                | 0                  |
| <b>Urodela</b>   |                                     |                            |                  |                    |
| Ambystomatidae   | <i>Ambystoma andersoni</i>          | North America              | 1                | 0                  |
| Ambystomatidae   | <i>Ambystoma californiense</i>      | North America              | 1                | 0                  |
| Ambystomatidae   | <i>Ambystoma gracile</i>            | North America              | 1                | 0                  |
| Ambystomatidae   | <i>Ambystoma jeffersonianum</i>     | North America              | 2                | 0                  |
| Ambystomatidae   | <i>Ambystoma laterale</i>           | North America              | 1                | 0                  |
| Ambystomatidae   | <i>Ambystoma mexicanum</i>          | North America              | 2                | 0                  |
| Ambystomatidae   | <i>Ambystoma macrodactylum</i>      | North America              | 4                | 0                  |
| Ambystomatidae   | <i>Ambystoma maculatum</i>          | North America              | 9                | 0                  |
| Ambystomatidae   | <i>Ambystoma mavortium</i>          | North America              | 5                | 0                  |
| Ambystomatidae   | <i>Ambystoma opacum</i>             | North America              | 2                | 0                  |
| Ambystomatidae   | <i>Ambystoma ordinarium</i>         | North America              | 3                | 0                  |
| Ambystomatidae   | <i>Ambystoma rivulare</i>           | North America              | 1                | 0                  |
| Ambystomatidae   | <i>Ambystoma tigrinum</i>           | North America              | 3                | 0                  |
| Ambystomatidae   | <i>Ambystoma velasci</i>            | North America              | 1                | 0                  |
| Cryptobranchidae | <i>Andrias davidianus</i>           | North America              | 3                | 0                  |
| Cryptobranchidae | <i>Andrias japonicas</i>            | North America              | 3                | 0                  |
| Dicamptodontidae | <i>Dicamptodon tenebrosus</i>       | North America              | 3                | 0                  |

| Family         | Species                               | Continent of origin | No tested | No positive |
|----------------|---------------------------------------|---------------------|-----------|-------------|
| Hynobiidae     | <i>Hynobius boulengeri</i>            | Asia                | 1         | 0           |
| Hynobiidae     | <i>Hynobius dunni</i>                 | Asia                | 3         | 0           |
| Hynobiidae     | <i>Hynobius naevius</i>               | Asia                | 1         | 0           |
| Hynobiidae     | <i>Hynobius quelpartensis</i>         | Asia                | 1         | 0           |
| Hynobiidae     | <i>Hynobius retardatus</i>            | Asia                | 8         | 0           |
| Hynobiidae     | <i>Hynobius tokyoensis</i>            | Asia                | 1         | 0           |
| Hynobiidae     | <i>Pachyhynobius shangchengensis</i>  | Asia                | 10        | 0           |
| Hynobiidae     | <i>Paradactylodon gorganensis</i>     | Asia                | 4         | 0           |
| Plethodontidae | <i>Aneides lugubris</i>               | North America       | 2         | 0           |
| Plethodontidae | <i>Aneides flavipunctus</i>           | North America       | 1         | 0           |
| Plethodontidae | <i>Bolitoglossa platydactyla</i>      | North America       | 5         | 0           |
| Plethodontidae | <i>Bolitoglossa rufescens</i>         | North America       | 8         | 0           |
| Plethodontidae | <i>Chiropetrotriton multidentatus</i> | North America       | 1         | 0           |
| Plethodontidae | <i>Chiropetrotriton sp.</i>           | North America       | 6         | 0           |
| Plethodontidae | <i>Chiropetrotriton sp.</i>           | North America       | 8         | 0           |
| Plethodontidae | <i>Desmognathus carolinensis</i>      | North America       | 3         | 0           |
| Plethodontidae | <i>Desmognathus fuscus</i>            | North America       | 1         | 0           |
| Plethodontidae | <i>Desmognathus marmoratus</i>        | North America       | 2         | 0           |
| Plethodontidae | <i>Desmognathus ochrophaeus</i>       | North America       | 1         | 0           |
| Plethodontidae | <i>Desmognathus quadramaculatus</i>   | North America       | 2         | 0           |
| Plethodontidae | <i>Ensatina eschscholtzii</i>         | North America       | 2         | 0           |
| Plethodontidae | <i>Eurycea bislineata</i>             | North America       | 2         | 0           |
| Plethodontidae | <i>Gyrinophilus porphyriticus</i>     | North America       | 1         | 0           |
| Plethodontidae | <i>Plethodon cylindraceus</i>         | North America       | 1         | 0           |
| Plethodontidae | <i>Plethodon glorobrius</i>           | North America       | 1         | 0           |
| Plethodontidae | <i>Plethodon glutinosus</i>           | North America       | 8         | 0           |
| Plethodontidae | <i>Plethodon shermani</i>             | North America       | 1         | 0           |
| Plethodontidae | <i>Pseudoeurycea bellii</i>           | Central America     | 7         | 0           |
| Plethodontidae | <i>Pseudoeurycea cephalica</i>        | Central America     | 5         | 0           |
| Plethodontidae | <i>Pseudoeurycea leprosa</i>          | Central America     | 18        | 0           |
| Plethodontidae | <i>Pseudoeurycea longicauda</i>       | Central America     | 5         | 0           |
| Plethodontidae | <i>Pseudoeurycea nigromaculata</i>    | Central America     | 1         | 0           |
| Plethodontidae | <i>Pseudoeurycea robertsi</i>         | Central America     | 3         | 0           |
| Plethodontidae | <i>Pseudotriton ruber</i>             | North America       | 2         | 0           |
| Plethodontidae | <i>Thorius troglodytes</i>            | Central America     | 1         | 0           |
| Salamandridae  | <i>Calotriton asper</i>               | Europe              | 1         | 0           |
| Salamandridae  | <i>Cynops cyanurus</i>                | Asia                | 3         | 0           |
| Salamandridae  | <i>Cynops ensicauda</i>               | Asia                | 6         | 0           |
| Salamandridae  | <i>Cynops pyrrhogaster</i>            | Asia                | 17        | 0           |
| Salamandridae  | <i>Cynops orientalis</i>              | Asia                | 3         | 0           |
| Salamandridae  | <i>Euproctus platycephalus</i>        | Europe              | 11        | 0           |
| Salamandridae  | <i>Ichthyosaura alpestris</i>         | Europe              | 16        | 0           |
| Salamandridae  | <i>Laotriton laoensis</i>             | Asia                | 4         | 0           |
| Salamandridae  | <i>Lissotriton boscai</i>             | Europe              | 1         | 0           |
| Salamandridae  | <i>Lissotriton montandoni</i>         | Europe              | 1         | 0           |
| Salamandridae  | <i>Lyciasalamandra billae</i>         | Asia                | 4         | 0           |
| Salamandridae  | <i>Lyciasalamandra fazilae</i>        | Asia                | 2         | 0           |
| Salamandridae  | <i>Mertensiella caucasica</i>         | Asia                | 8         | 0           |

| <b>Family</b>      | <b>Species</b>                       | <b>Continent of origin</b> | <b>No tested</b> | <b>No positive</b> |
|--------------------|--------------------------------------|----------------------------|------------------|--------------------|
| Salamandridae      | <i>Neurergus crocatus</i>            | Asia                       | 1                | 0                  |
| Salamandridae      | <i>Neurergus kaiseri</i>             | Asia                       | 20               | 0                  |
| Salamandridae      | <i>Neurergus strauchii</i>           | Asia                       | 6                | 0                  |
| Salamandridae      | <i>Ommatotriton ophryticus</i>       | Asia                       | 3                | 0                  |
| Salamandridae      | <i>Pachytriton</i> sp.               | Asia                       | 2                | 0                  |
| Salamandridae      | <i>Paramesotriton caudopunctatus</i> | Asia                       | 4                | 0                  |
| Salamandridae      | <i>Paramesotriton chinensis</i>      | Asia                       | 12               | 0                  |
| Salamandridae      | <i>Paramesotriton deloustali</i>     | Asia                       | 4                | 0                  |
| Salamandridae      | <i>Paramesotriton fuzhongensis</i>   | Asia                       | 1                | 0                  |
| Salamandridae      | <i>Paramesotriton hongkongensis</i>  | Asia                       | 7                | 0                  |
| Salamandridae      | <i>Pleurodeles nebulosus</i>         | Africa                     | 2                | 0                  |
| Salamandridae      | <i>Pleurodeles waltl</i>             | Europe                     | 14               | 0                  |
| Salamandridae      | <i>Pleurodeles poireti</i>           | Africa                     | 1                | 0                  |
| Salamandridae      | <i>Salamandra algira</i>             | Africa                     | 7                | 0                  |
| Salamandridae      | <i>Salamandra corsica</i>            | Europe                     | 1                | 0                  |
| Salamandridae      | <i>Salamandra infraimmaculata</i>    | Asia                       | 7                | 0                  |
| Salamandridae      | <i>Salamandra salamandra</i>         | Europe                     | 5                | 0                  |
| Salamandridae      | <i>Taricha granulosa</i>             | North America              | 2                | 0                  |
| Salamandridae      | <i>Taricha rivularis</i>             | North America              | 1                | 0                  |
| Salamandridae      | <i>Taricha sierrae</i>               | North America              | 1                | 0                  |
| Salamandridae      | <i>Taricha torosa</i>                | North America              | 1                | 0                  |
| Salamandridae      | <i>Triturus carnifex</i>             | Europe                     | 6                | 0                  |
| Salamandridae      | <i>Triturus cristatus</i>            | Europe                     | 1                | 0                  |
| Salamandridae      | <i>Triturus dobrogicus</i>           | Europe                     | 1                | 0                  |
| Salamandridae      | <i>Triturus karelinii</i>            | Europe                     | 1                | 0                  |
| Salamandridae      | <i>Triturus marmoratus</i>           | Europe                     | 1                | 0                  |
| Salamandridae      | <i>Tylosotriton asperrimus</i>       | Asia                       | 1                | 0                  |
| Salamandridae      | <i>Tylosotriton kweichowensis</i>    | Asia                       | 12               | 0                  |
| Salamandridae      | <i>Tylosotriton shanjing</i>         | Asia                       | 6                | 0                  |
| Salamandridae      | <i>Tylosotriton taliangensis</i>     | Asia                       | 1                | 0                  |
| Salamandridae      | <i>Tylosotriton vietnamensis</i>     | Asia                       | 18               | 3                  |
| Salamandridae      | <i>Tylosotriton verrucosus</i>       | Asia                       | 4                | 0                  |
| Salamandridae      | <i>Tylosotriton wuxianensis</i>      | Asia                       | 3                | 0                  |
| Salamandridae      | <i>Tylosotriton zieglerei</i>        | Asia                       | 1                | 0                  |
| Sirenidae          | <i>Siren intermedia</i>              | North America              | 1                | 0                  |
| <b>Gymnophiona</b> |                                      |                            |                  |                    |
| Dermophiidae       | <i>Geotrypetes seraphini</i>         | Africa                     | 1                | 0                  |
| Herpeliidae        | <i>Herpele</i> sp.                   | Africa                     | 1                | 0                  |



**Table S8. Summary of the *B. salamandrivorans* survey of amphibians in captivity.** The table lists the number of individuals that were tested, the number that were *B. salamandrivorans*-positive, *B. salamandrivorans* prevalence (proportion infected) and the Clopper-Pearson 95% confidence interval for prevalence.

| <b>Taxonomic group</b> | <b>Number tested</b> | <b>Number positive</b> | <b>Proportion infected</b> | <b>Clopper-Pearson 95% CI</b> | <b>Probability of detecting at least 1 positive individual (assuming prevalence = 0.01)</b> |
|------------------------|----------------------|------------------------|----------------------------|-------------------------------|---------------------------------------------------------------------------------------------|
| urodelans              | 408                  | 3                      | 0.0073                     | 0.0015 - 0.0212               | 0.9834                                                                                      |
| anurans                | 159                  | 0                      | 0.0000                     | 0.0000 - 0.0229               | 0.7977                                                                                      |

**Table S9. Species susceptibility category used for ancestral state reconstruction.**

| <b>Species</b>                       | <b>Category</b> |
|--------------------------------------|-----------------|
| <i>Typhlonectes compressicauda</i>   | Resistant       |
| <i>Bombina variegata</i>             | Resistant       |
| <i>Alytes obstetricans</i>           | Resistant       |
| <i>Discoglossus scovazzi</i>         | Resistant       |
| <i>Silurana tropicalis</i>           | Resistant       |
| <i>Pelobates fuscus</i>              | Resistant       |
| <i>Pelodytes punctatus</i>           | Resistant       |
| <i>Epidalea calamita</i>             | Resistant       |
| <i>Hyla arborea</i>                  | Resistant       |
| <i>Lithobates catesbeianus</i>       | Resistant       |
| <i>Rana temporaria</i>               | Resistant       |
| <i>Hynobius retardatus</i>           | Resistant       |
| <i>Salamandrella keyserlingii</i>    | Tolerant        |
| <i>Pachyhynobius shangchengensis</i> | Resistant       |
| <i>Siren intermedia</i>              | Tolerant        |
| <i>Plethodon glutinosus</i>          | Resistant       |
| <i>Hydromantes strinatii</i>         | Lethal          |
| <i>Gyrinophilus porphyriticus</i>    | Resistant       |
| <i>Ambystoma opacum/maculatum</i>    | Resistant       |
| <i>Salamandrina perspicillata</i>    | Lethal          |
| <i>Salamandra salamandra</i>         | Lethal          |
| <i>Pleurodeles waltl</i>             | Lethal          |
| <i>Tylotriton wenxianensis</i>       | Lethal          |
| <i>Nothophthalmus viridescens</i>    | Lethal          |
| <i>Taricha granulosa</i>             | Lethal          |
| <i>Euproctus platycephalus</i>       | Lethal          |
| <i>Lissotriton helveticus</i>        | Resistant       |
| <i>Lissotriton italicus</i>          | Lethal          |
| <i>Ichthyosaura alpestris</i>        | Lethal          |
| <i>Triturus cristatus</i>            | Lethal          |
| <i>Neurergus crocatus</i>            | Lethal          |
| <i>Cynops cyanurus</i>               | Susceptible     |
| <i>Cynops pyrrhogaster</i>           | Susceptible     |
| <i>Paramesotriton deloustali</i>     | Susceptible     |

**Table S10. Results of the Maximum Parsimony (MP) and Maximum Likelihood ancestral state reconstructions of amphibian susceptibility to *B. salamandrivorans*.** Node numbers are cross-referenced on the tree in Figure S5.

| Node N° | MP          | Maximum Likelihood Probabilities |          |             |          |
|---------|-------------|----------------------------------|----------|-------------|----------|
|         |             | Resistant                        | Tolerant | Susceptible | Lethal   |
| 2       | Resistant   | 0.988270                         | 0.004081 | 0.003628    | 0.004021 |
| 4       | Resistant   | 0.995242                         | 0.001770 | 0.001282    | 0.001706 |
| 5       | Resistant   | 0.999975                         | 8.48E-06 | 7.91E-06    | 8.40E-06 |
| 6       | Resistant   | 0.999792                         | 6.94E-05 | 6.93E-05    | 6.94E-05 |
| 8       | Resistant   | 0.999366                         | 2.11E-04 | 2.11E-04    | 2.11E-04 |
| 11      | Resistant   | 0.999986                         | 4.87E-06 | 4.75E-06    | 4.85E-06 |
| 13      | Resistant   | 0.999968                         | 1.07E-05 | 1.07E-05    | 1.07E-05 |
| 14      | Resistant   | 0.999248                         | 2.51E-04 | 2.51E-04    | 2.51E-04 |
| 17      | Resistant   | 0.999606                         | 1.31E-04 | 1.31E-04    | 1.31E-04 |
| 18      | Resistant   | 0.999846                         | 5.12E-05 | 5.12E-05    | 5.12E-05 |
| 21      | Resistant   | 0.999968                         | 1.08E-05 | 1.08E-05    | 1.08E-05 |
| 24      | Resistant   | 0.993609                         | 0.003138 | 4.68E-04    | 0.002785 |
| 25      | Resistant   | 0.995580                         | 0.004139 | 1.28E-04    | 1.53E-04 |
| 26      | Resistant   | 0.992494                         | 0.007093 | 1.97E-04    | 2.17E-04 |
| 30      | Resistant   | 0.985569                         | 0.006714 | 7.29E-04    | 0.006988 |
| 32      | Resistant   | 0.984866                         | 0.001610 | 3.23E-04    | 0.013201 |
| 33      | Resistant   | 0.991893                         | 1.49E-04 | 1.13E-04    | 0.007845 |
| 34      | Resistant   | 0.990246                         | 1.98E-04 | 1.65E-04    | 0.009392 |
| 38      | Resistant   | 0.956639                         | 0.001879 | 9.90E-04    | 0.040492 |
| 40      | Lethal      | 0.008573                         | 2.55E-04 | 2.47E-04    | 0.990926 |
| 42      | Lethal      | 8.28E-04                         | 2.96E-05 | 2.89E-05    | 0.999113 |
| 44      | Lethal      | 5.86E-06                         | 6.66E-07 | 6.70E-07    | 0.999993 |
| 45      | Lethal      | 1.21E-05                         | 1.18E-05 | 1.18E-05    | 0.999964 |
| 48      | Lethal      | 2.00E-07                         | 1.42E-07 | 3.21E-07    | 0.999999 |
| 49      | Lethal      | 7.10E-06                         | 7.09E-06 | 7.12E-06    | 0.999979 |
| 52      | Lethal      | 9.92E-07                         | 9.66E-07 | 3.33E-05    | 0.999965 |
| 54      | Lethal      | 7.13E-06                         | 6.72E-06 | 5.65E-04    | 0.999421 |
| 55      | Lethal      | 9.35E-07                         | 1.34E-07 | 5.85E-06    | 0.999993 |
| 56      | Lethal      | 8.93E-05                         | 2.37E-06 | 3.31E-06    | 0.999905 |
| 57      | Lethal      | 8.71E-04                         | 2.18E-05 | 2.27E-05    | 0.999085 |
| 61      | Lethal      | 3.01E-06                         | 2.93E-06 | 3.53E-06    | 0.999991 |
| 64      | Susceptible | 2.52E-05                         | 2.52E-05 | 0.997828    | 0.002122 |
| 65      | Susceptible | 7.54E-06                         | 7.54E-06 | 0.999422    | 5.63E-04 |

## References and Notes

1. D. B. Wake, V. T. Vredenburg, Are we in the midst of the sixth mass extinction? A view from the world of amphibians. *Proc. Natl. Acad. Sci. U.S.A.* **105** (suppl. 1), 11466–11473 (2008). [Medline doi:10.1073/pnas.0801921105](#)
2. M. C. Fisher, D. A. Henk, C. J. Briggs, J. S. Brownstein, L. C. Madoff, S. L. McCraw, S. J. Gurr, Emerging fungal threats to animal, plant and ecosystem health. *Nature* **484**, 186–194 (2012). [Medline doi:10.1038/nature10947](#)
3. A. Martel, A. Spitzen-van der Sluijs, M. Blooi, W. Bert, R. Ducatelle, M. C. Fisher, A. Woeltjes, W. Bosman, K. Chiers, F. Bossuyt, F. Pasmans, *Batrachochytrium salamandrivorans* sp. nov. causes lethal chytridiomycosis in amphibians. *Proc. Natl. Acad. Sci. U.S.A.* **110**, 15325–15329 (2013). [Medline doi:10.1073/pnas.1307356110](#)
4. A. Spitzen-van der Sluijs, F. Spikmans, W. Bosman, M. de Zeeuw, T. van der Meij, E. Goverse, M. Kik, F. Pasmans, A. Martel, Rapid enigmatic decline drives the fire salamander (*Salamandra salamandra*) to the edge of extinction in The Netherlands. *Amphib.-reptil.* **34**, 233–239 (2013).
5. A. Spitzen-van der Sluijs, A. Martel, C.A. Hallnam, W. Bosman, T.W. Garner, P. Van Rooij, R. Jooris, F. Haesebrouck, F. Pasmans, Environmental determinants of recent endemism of *Batrachochytrium dendrobatidis* infections in amphibian assemblages in the absence of disease outbreaks. *Conserv. Biol.* **28**, 1302–1311 (2014).
6. M. Blooi, F. Pasmans, J. E. Longcore, A. Spitzen-van der Sluijs, F. Vercammen, A. Martel, Duplex real-time PCR for rapid simultaneous detection of *Batrachochytrium dendrobatidis* and *Batrachochytrium salamandrivorans* in amphibian samples. *J. Clin. Microbiol.* **51**, 4173–4177 (2013). [Medline doi:10.1128/JCM.02313-13](#)
7. P. Zhang, T. J. Papenfuss, M. H. Wake, L. Qu, D. B. Wake, Phylogeny and biogeography of the family Salamandridae (Amphibia: Caudata) inferred from complete mitochondrial genomes. *Mol. Phylogenet. Evol.* **49**, 586–597 (2008). [Medline doi:10.1016/j.ympev.2008.08.020](#)
8. A. Herrel, A. van der Meijden, An analysis of the live reptile and amphibian trade in the U.S.A. compared to the global trade in endangered species. *Herpetol. J.* **24**, 103–110 (2014).
9. L. Berger, A. D. Hyatt, V. Olsen, S. G. Hengstberger, D. Boyle, G. Marantelli, K. Humphreys, J. E. Longcore, Production of polyclonal antibodies to *Batrachochytrium dendrobatidis* and their use in an immunoperoxidase test for chytridiomycosis in amphibians. *Dis. Aquat. Organ.* **48**, 213–220 (2002). [Medline doi:10.3354/dao048213](#)
10. T. N. Thien A. Martel M. Brutyn S. Bogaerts M. Sparreboom F. Haesebrouck M. C. Fisher W. Beukema T. D. Van K. Chiers F. Pasmans A survey for *Batrachochytrium dendrobatidis* in endangered and highly susceptible vietnamese salamanders (*Tylototriton* spp.). *J. Zoo Wildl. Med.* **44**, 627–633 (2013). [Medline doi:10.1638/2012-0181R.1](#)
11. A. Martel, C. Adriaensen, M. Sharifian-Fard, A. Spitzen-van der Sluijs, G. Louette, K. Baert, B. Crombaghs, J. Dewulf, F. Pasmans, The absence of zoonotic agents in invasive

- bullfrogs (*Lithobates catesbeianus*) in Belgium and The Netherlands. *EcoHealth* **10**, 344–347 (2013). [Medline doi:10.1007/s10393-013-0864-0](#)
12. F. Pasmans, P. Van Rooij, M. Blooi, G. Tessa, S. Bogaerts, G. Sotgiu, T. W. Garner, M. C. Fisher, B. R. Schmidt, T. Woeltjes, W. Beukema, S. Bovero, C. Adriaensen, F. Oneto, D. Ottonello, A. Martel, S. Salvidio, Resistance to chytridiomycosis in European plethodontid salamanders of the genus *Speleomantes*. *PLOS ONE* **8**, e63639 (2013). [Medline doi:10.1371/journal.pone.0063639](#)
  13. K. Nishikawa, W. Khonsue, P. Pomchote, M. Matsui, Two new species of Tylototriton from Thailand (Amphibia: Urodela: Salamandridae). *Zootaxa* **3737**, 261–279 (2013). [Medline doi:10.11646/zootaxa.3737.3.5](#)
  14. S. Lötters, J. Kielgast, M. Sztatecsny, N. Wagner, U. Schulte, P. Werner, D. Rodder, J. Dambach, T. Reissner, A. Hochkirch, B. R. Schmidt, Absence of infection with the amphibian chytrid fungus in the terrestrial Alpine salamander, *Salamandra atra*. *Salamandra (Frankf.)* **48**, 58–62 (2012).
  15. E. H. El Mouden, T. Slimani, D. Donaire, S. Fernandez-Beaskoltxea, M. C. Fisher, J. Bosch, First record of the chytrid fungus *Batrachochytrium dendrobatidis* in North Africa. *Herpetol. Rev.* **42**, 71–75 (2011).
  16. J. Vörös, J. Bosch, A. Dán, T. Hartel, First record of *Batrachochytrium dendrobatidis* on amphibians in Romania. *North-West. J. Zool.* **9**, 446–449 (2013).
  17. E. Obón, F. Carbonell, E. Valbuena-Urena, M. Alonso, R. Larios, S. Fernandez-Beaskoltxea, M.C. Fisher, J. Bosch, Chytridiomycosis surveillance in the critically endangered Montseny brook newt, *Calotriton arnoldi*, northeastern Spain. *Herpetol. J.* **23**, 237–240 (2013).
  18. A. Spitzen-van der Sluijs, A. Martel, E. Wombwell, P. Van Rooij, R. Zollinger, T. Woeltjes, M. Rendle, F. Haesebrouck, F. Pasmans, Clinically healthy amphibians in captive collections and at pet fairs: A reservoir of *Batrachochytrium dendrobatidis*. *Amphib.-Reptil.* **32**, 419–423 (2011). [doi:10.1163/017353711X579830](#)
  19. A. Martel, M. S. Fard, P. Van Rooij, R. Jooris, F. Boone, F. Haesebrouck, D. Van Rooij, F. Pasmans, Road-killed common toads (*Bufo bufo*) in Flanders (Belgium) reveal low prevalence of ranaviruses and *Batrachochytrium dendrobatidis*. *J. Wildl. Dis.* **48**, 835–839 (2012). [Medline doi:10.7589/0090-3558-48.3.835](#)
  20. A. J. Crawford, K. R. Lips, E. Bermingham, Epidemic disease decimates amphibian abundance, species diversity, and evolutionary history in the highlands of central Panama. *Proc. Natl. Acad. Sci. U.S.A.* **107**, 13777–13782 (2010). [Medline doi:10.1073/pnas.0914115107](#)
  21. N. M. Caruso, K. R. Lips, Truly enigmatic declines in terrestrial salamander populations in Great Smoky Mountains National Park. *Divers. Distrib.* **19**, 38–48 (2013). [doi:10.1111/j.1472-4642.2012.00938.x](#)
  22. M. Schenkel, thesis, University of Zurich, Zurich, Switzerland (2012).
  23. U. Tobler, thesis, University of Zurich, Zurich, Switzerland (2011).

24. U. Tobler, A. Borgula, B. R. Schmidt, Populations of a susceptible amphibian species can grow despite the presence of a pathogenic chytrid fungus. *PLOS ONE* **7**, e34667 (2012). [Medline doi:10.1371/journal.pone.0034667](#)
25. K. Goka, J. Yokoyama, Y. Une, T. Kuroki, K. Suzuki, M. Nakahara, A. Kobayashi, S. Inaba, T. Mizutani, A. D. Hyatt, Amphibian chytridiomycosis in Japan: Distribution, haplotypes and possible route of entry into Japan. *Mol. Ecol.* **18**, 4757–4774 (2009). [Medline doi:10.1111/j.1365-294X.2009.04384.x](#)
26. J. E. Kolby, K. M. Smith, L. Berger, W. B. Karesh, A. Preston, A. P. Pessier, L. F. Skerratt, First evidence of amphibian chytrid fungus (*Batrachochytrium dendrobatidis*) and ranavirus in Hong Kong amphibian trade. *PLOS ONE* **9**, e90750 (2014). [Medline doi:10.1371/journal.pone.0090750](#)
27. K. Katoh, D. M. Standley, MAFFT multiple sequence alignment software version 7: Improvements in performance and usability. *Mol. Biol. Evol.* **30**, 772–780 (2013). [Medline doi:10.1093/molbev/mst010](#)
28. D. L. Swofford, PAUP\*, version 4 (Sinauer Associates, Sunderland, MA, 1998).
29. F. Ronquist, M. Teslenko, P. van der Mark, D. L. Ayres, A. Darling, S. Höhna, B. Larget, L. Liu, M. A. Suchard, J. P. Huelsenbeck, MrBayes 3.2: Efficient Bayesian phylogenetic inference and model choice across a large model space. *Syst. Biol.* **61**, 539–542 (2012). [Medline doi:10.1093/sysbio/sys029](#)
30. A. J. Drummond, M. A. Suchard, D. Xie, A. Rambaut, Bayesian phylogenetics with BEAUti and the BEAST 1.7. *Mol. Biol. Evol.* **29**, 1969–1973 (2012). [Medline doi:10.1093/molbev/mss075](#)
31. S. B. Hedges, J. Dudley, S. Kumar, TimeTree: A public knowledge-base of divergence times among organisms. *Bioinformatics* **22**, 2971–2972 (2006). [Medline doi:10.1093/bioinformatics/btl505](#)
32. C. Berney, J. Pawlowski, A molecular time-scale for eukaryote evolution recalibrated with the continuous microfossil record. *Proc. Biol. Sci.* **273**, 1867–1872 (2006). [Medline doi:10.1098/rspb.2006.3537](#)
33. K. Roelants, D. J. Gower, M. Wilkinson, S. P. Loader, S. D. Biju, K. Guillaume, L. Moriau, F. Bossuyt, Global patterns of diversification in the history of modern amphibians. *Proc. Natl. Acad. Sci. U.S.A.* **104**, 887–892 (2007). [Medline doi:10.1073/pnas.0608378104](#)
34. S. Steinfartz, S. Vicario, J. W. Arntzen, A. Caccone, A Bayesian approach on molecules and behavior: Reconsidering phylogenetic and evolutionary patterns of the Salamandridae with emphasis on *Triturus newts*. *J. Exp. Zoolog. B Mol. Dev. Evol.* **308B**, 139–162 (2007) </jrn>. [doi:10.1002/jez.b.21119](#)
35. P. Zhang, Y. Q. Chen, H. Zhou, Y. F. Liu, X. L. Wang, T. J. Papenfuss, D. B. Wake, L. H. Qu, Phylogeny, evolution, and biogeography of Asiatic Salamanders (Hynobiidae). *Proc. Natl. Acad. Sci. U.S.A.* **103**, 7360–7365 (2006). [Medline doi:10.1073/pnas.0602325103](#)
36. P. Zhang, D. B. Wake, Higher-level salamander relationships and divergence dates inferred from complete mitochondrial genomes. *Mol. Phylogenet. Evol.* **53**, 492–508 (2009). [Medline doi:10.1016/j.ympev.2009.07.010](#)

37. W. P. Maddison, D. R. Maddison, <http://mesquiteproject.org> (2009).
38. P. O. Lewis, A likelihood approach to estimating phylogeny from discrete morphological character data. *Syst. Biol.* **50**, 913–925 (2001). [Medline](#)  
[doi:10.1080/106351501753462876](https://doi.org/10.1080/106351501753462876)
39. R. F. DiGiacomo, T. D. Koepsell, Sampling for detection of infection or disease in animal populations. *J. Am. Vet. Med. Assoc.* **189**, 22–23 (1986). [Medline](#)
